# Supplementary material for: Highly regulated, diversifying NTP-dependent biological conflict systems with implications for the emergence of multicellularity
Source: eLife journal article supplement (doi:10.7554/elife.52696), 2020-02-26

VMAP ;  $p=$  0 ;  $n=$  716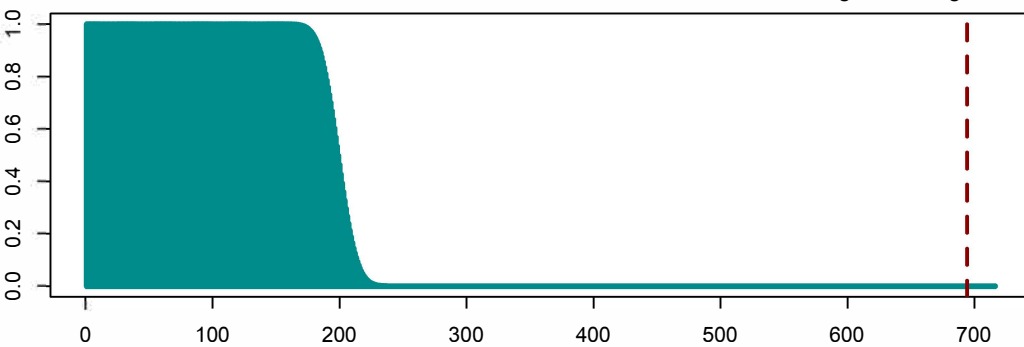

Figure 2 - Figure supplement 1

iSTAND ;  $p=$  3.89e-24 ;  $n=$  103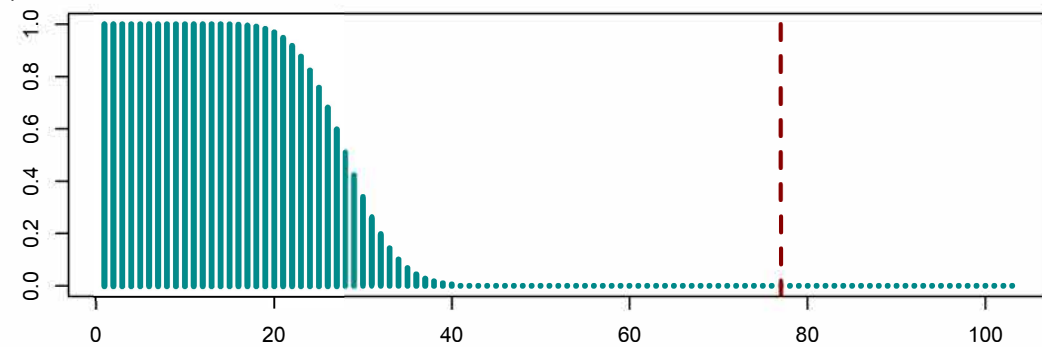FtsH ;  $p=$  7.08e-23 ;  $n=$  79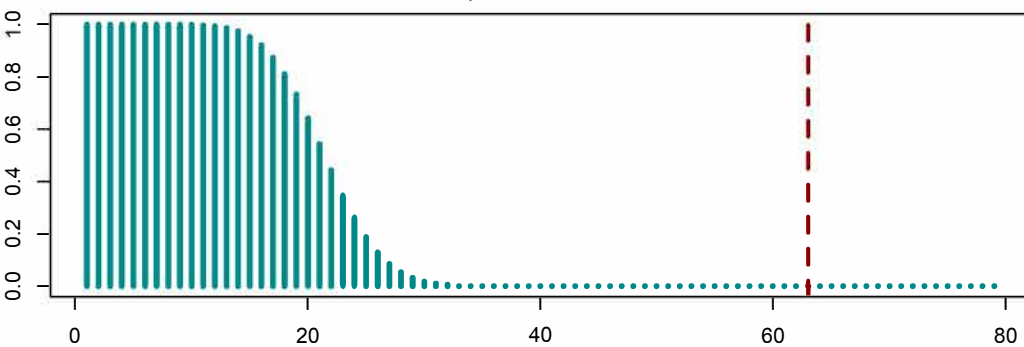beta propeller ;  $p=$  0.0094 ;  $n=$  118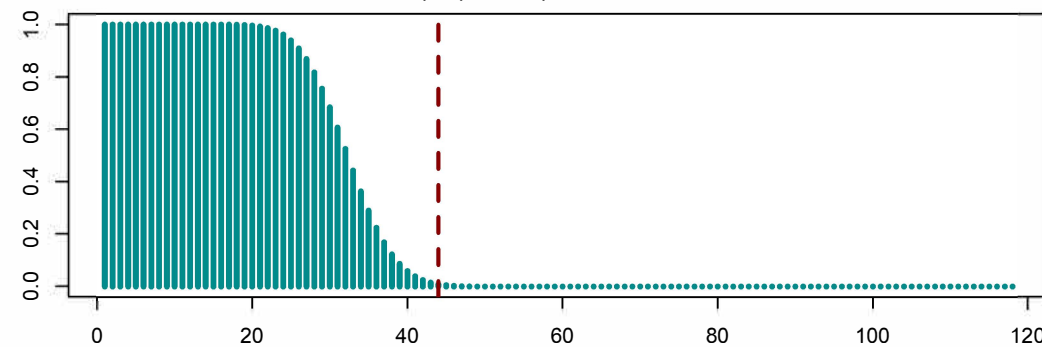GAP1-N1 ;  $p=$  1 ;  $n=$  262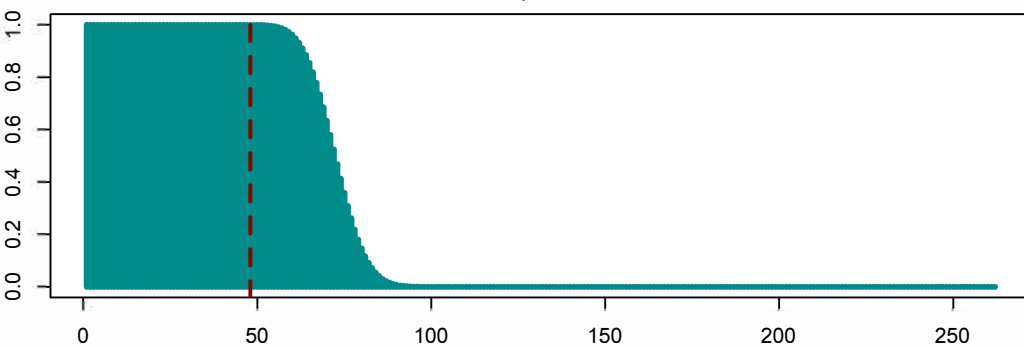GAP1-N2 ;  $p=$  6.01e-152 ;  $n=$  904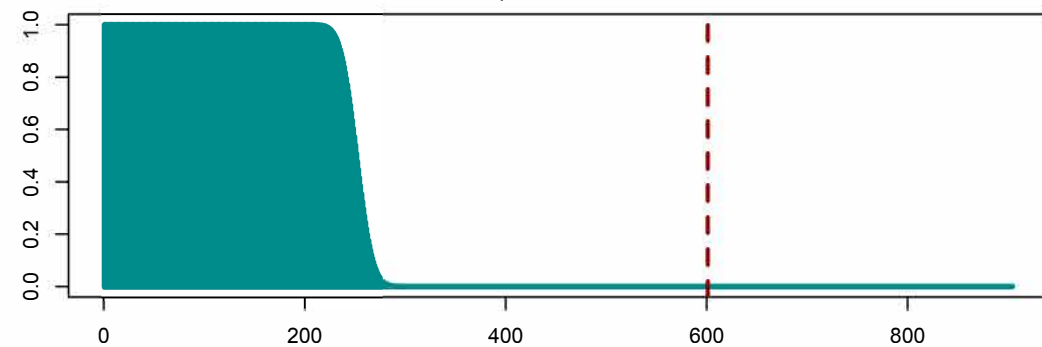NucA ;  $p=$  6.33e-08 ;  $n=$  45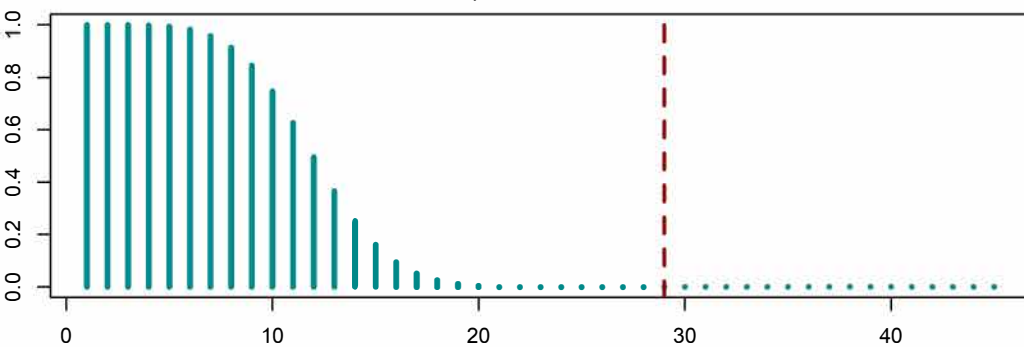EACC1 ;  $p=$  0 ;  $n=$  671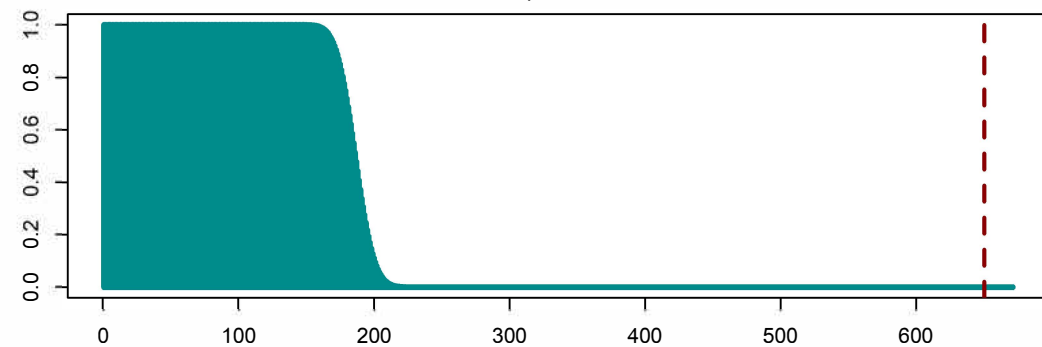

Supplement: supp [file elife-52696-supp-v1.zip]
