# Supplementary material for: Highly regulated, diversifying NTP-dependent biological conflict systems with implications for the emergence of multicellularity
Source: eLife. 2020 Feb 26;9:e52696. doi: 10.7554/eLife.52696 (PMC7159879; doi:10.7554/eLife.52696)
Supplement: Supplementary file 1. — Multicellular flag is defined as either TRUE, FALSE, or NA (not enough information available) (see Materials and methods). [file elife-52696-supp1.csv]

	species	multicellularity
1	Acidimicrobium ferrooxidans DSM 10331	FALSE
2	Acidipropionibacterium acidipropionici	FALSE
3	Acidipropionibacterium acidipropionici ATCC 4875	FALSE
4	Acidothermus cellulolyticus 11B	FALSE
5	Actinoalloteichus hoggarensis	TRUE
6	Actinoalloteichus hymeniacidonis	TRUE
7	Actinoalloteichus sp ADI1277	TRUE
8	Actinoalloteichus sp GBA12924	TRUE
9	Actinobacteria bacterium IMCC26256	NA
10	Actinobacteria bacterium MMS21122	NA
11	Actinobacteria bacterium MMS21160	NA
12	Actinobacteria bacterium MMSIIB91	NA
13	Actinomyces gaoshouyii	FALSE
14	Actinomyces meyeri	FALSE
15	Actinomyces oris	FALSE
16	Actinomyces radicidentis	FALSE
17	Actinomyces sp oral taxon 414	FALSE
18	Actinomyces sp VUL4_3	FALSE
19	Actinoplanes friuliensis DSM 7358	TRUE
20	Actinoplanes missouriensis 431	TRUE
21	Actinoplanes sp N902109	TRUE
22	Actinoplanes sp SE50110	TRUE
23	Actinopolyspora erythraea	TRUE
24	Actinosynnema mirum DSM 43827	TRUE
25	Actinotignum schaalii	FALSE
26	Adlercreutzia equolifaciens DSM 19450	FALSE
27	Aeromicrobium erythreum	FALSE
28	Agromyces aureus	TRUE
29	Alloactinosynnema sp L07	TRUE
30	Amycolatopsis japonica	TRUE
31	Amycolatopsis lurida NRRL 2430	TRUE
32	Amycolatopsis mediterranei RB	TRUE
33	Amycolatopsis mediterranei S699	TRUE
34	Amycolatopsis mediterranei U32	TRUE
35	Amycolatopsis methanolica 239	TRUE
36	Amycolatopsis orientalis	TRUE
37	Amycolatopsis orientalis HCCB10007	TRUE
38	Arcanobacterium haemolyticum DSM 20595	FALSE
39	Arsenicicoccus sp oral taxon 190	FALSE
40	Arthrobacter alpinus	FALSE
41	Arthrobacter sp A3	FALSE
42	Arthrobacter sp ATCC 21022	FALSE
43	Arthrobacter sp ERGS101	FALSE
44	Arthrobacter sp FB24	FALSE
45	Arthrobacter sp Hiyo8	FALSE
46	Arthrobacter sp IHBB 11108	FALSE
47	Arthrobacter sp LS16	FALSE
48	Arthrobacter sp PAMC 25486	FALSE
49	Arthrobacter sp QXT31	FALSE
50	Arthrobacter sp Rue61a	FALSE
51	Arthrobacter sp U41	FALSE
52	Arthrobacter sp YCRL1	FALSE
53	Arthrobacter sp YN	FALSE
54	Arthrobacter sp ZXY2	FALSE
55	Atopobium parvulum DSM 20469	FALSE
56	Beutenbergia cavernae DSM 12333	FALSE
57	Bifidobacterium actinocoloniiforme DSM 22766	FALSE
58	Bifidobacterium adolescentis	FALSE
59	Bifidobacterium adolescentis ATCC 15703	FALSE
60	Bifidobacterium angulatum	FALSE
61	Bifidobacterium angulatum DSM 20098 JCM 7096	FALSE
62	Bifidobacterium animalis	FALSE
63	Bifidobacterium animalis subsp animalis	FALSE
64	Bifidobacterium animalis subsp animalis ATCC 25527	FALSE
65	Bifidobacterium animalis subsp lactis	FALSE
66	Bifidobacterium animalis subsp lactis AD011	FALSE
67	Bifidobacterium animalis subsp lactis ATCC 27673	FALSE
68	Bifidobacterium animalis subsp lactis B420	FALSE
69	Bifidobacterium animalis subsp lactis BB12	FALSE
70	Bifidobacterium animalis subsp lactis Bi07	FALSE
71	Bifidobacterium animalis subsp lactis Bl04	FALSE
72	Bifidobacterium animalis subsp lactis Bl12	FALSE
73	Bifidobacterium animalis subsp lactis BLC1	FALSE
74	Bifidobacterium animalis subsp lactis CNCM I2494	FALSE
75	Bifidobacterium animalis subsp lactis DSM 10140	FALSE
76	Bifidobacterium animalis subsp lactis KLDS20603	FALSE
77	Bifidobacterium animalis subsp lactis V9	FALSE
78	Bifidobacterium asteroides PRL2011	FALSE
79	Bifidobacterium bifidum	FALSE
80	Bifidobacterium bifidum ATCC 29521 JCM 1255 DSM 20456	FALSE
81	Bifidobacterium bifidum BGN4	FALSE
82	Bifidobacterium bifidum PRL2010	FALSE
83	Bifidobacterium bifidum S17	FALSE
84	Bifidobacterium breve	FALSE
85	Bifidobacterium breve 12L	FALSE
86	Bifidobacterium breve 689b	FALSE
87	Bifidobacterium breve ACS071VSch8b	FALSE
88	Bifidobacterium breve DSM 20213 JCM 1192	FALSE
89	Bifidobacterium breve JCM 7017	FALSE
90	Bifidobacterium breve JCM 7019	FALSE
91	Bifidobacterium breve NCFB 2258	FALSE
92	Bifidobacterium breve S27	FALSE
93	Bifidobacterium breve UCC2003	FALSE
94	Bifidobacterium catenulatum DSM 16992 JCM 1194 LMG 11043	FALSE
95	Bifidobacterium coryneforme	FALSE
96	Bifidobacterium dentium Bd1	FALSE
97	Bifidobacterium dentium JCM 1195 DSM 20436	FALSE
98	Bifidobacterium indicum LMG 11587 DSM 20214	FALSE
99	Bifidobacterium kashiwanohense JCM 15439 DSM 21854	FALSE
100	Bifidobacterium kashiwanohense PV202	FALSE
101	Bifidobacterium longum	FALSE
102	Bifidobacterium longum DJO10A	FALSE
103	Bifidobacterium longum NCC2705	FALSE
104	Bifidobacterium longum subsp infantis	FALSE
105	Bifidobacterium longum subsp infantis 157F	FALSE
106	Bifidobacterium longum subsp infantis ATCC 15697 JCM 1222 DSM 20088	FALSE
107	Bifidobacterium longum subsp longum	FALSE
108	Bifidobacterium longum subsp longum BBMN68	FALSE
109	Bifidobacterium longum subsp longum GT15	FALSE
110	Bifidobacterium longum subsp longum JCM 1217	FALSE
111	Bifidobacterium longum subsp longum JDM301	FALSE
112	Bifidobacterium longum subsp longum KACC 91563	FALSE
113	Bifidobacterium pseudocatenulatum DSM 20438 JCM 1200 LMG 10505	FALSE
114	Bifidobacterium pseudolongum	FALSE
115	Bifidobacterium pseudolongum PV82	FALSE
116	Bifidobacterium scardovii JCM 12489 DSM 13734	FALSE
117	Bifidobacterium thermophilum RBL67	FALSE
118	Blastococcus saxobsidens DD2	FALSE
119	Brachybacterium faecium DSM 4810	FALSE
120	Brachybacterium sp P610X1	FALSE
121	Brachybacterium sp VR2415	FALSE
122	Brevibacterium flavum	FALSE
123	Brevibacterium flavum ZL1	FALSE
124	Brevibacterium linens	FALSE
125	Candidatus Planktophila limnetica	FALSE
126	Candidatus Planktophila sp MMS21155	FALSE
127	Candidatus Planktophila sp MMSIA56	FALSE
128	Candidatus Planktophila sp MMSIA79	FALSE
129	Candidatus Planktophila sp MMSIIA15	FALSE
130	Candidatus Planktophila sp MMSIIB60	FALSE
131	Candidatus Rhodoluna planktonica	FALSE
132	Catenulispora acidiphila DSM 44928	TRUE
133	Cellulomonas fimi ATCC 484	FALSE
134	Cellulomonas flavigena DSM 20109	FALSE
135	Cellulomonas gilvus ATCC 13127	FALSE
136	Cellulomonas sp PSBB021	FALSE
137	Cellulosimicrobium cellulans	FALSE
138	Cellulosimicrobium sp TH20	FALSE
139	Clavibacter michiganensis subsp capsici	FALSE
140	Clavibacter michiganensis subsp insidiosus	FALSE
141	Clavibacter michiganensis subsp michiganensis NCPPB 382	FALSE
142	Clavibacter michiganensis subsp nebraskensis NCPPB 2581	FALSE
143	Clavibacter michiganensis subsp sepedonicus	FALSE
144	Cnuibacter physcomitrellae	FALSE
145	Conexibacter woesei DSM 14684	FALSE
146	Coriobacteriaceae bacterium 6813	FALSE
147	Coriobacterium glomerans PW2	FALSE
148	Corynebacterium ammoniagenes	FALSE
149	Corynebacterium ammoniagenes DSM 20306	FALSE
150	Corynebacterium aquilae DSM 44791	FALSE
151	Corynebacterium argentoratense DSM 44202	FALSE
152	Corynebacterium atypicum	FALSE
153	Corynebacterium aurimucosum ATCC 700975	FALSE
154	Corynebacterium callunae DSM 20147	FALSE
155	Corynebacterium camporealensis	FALSE
156	Corynebacterium casei LMG S19264	FALSE
157	Corynebacterium crudilactis	FALSE
158	Corynebacterium cystitidis	FALSE
159	Corynebacterium deserti GIMN1010	FALSE
160	Corynebacterium diphtheriae	FALSE
161	Corynebacterium diphtheriae 241	FALSE
162	Corynebacterium diphtheriae 31A	FALSE
163	Corynebacterium diphtheriae BH8	FALSE
164	Corynebacterium diphtheriae C7 beta	FALSE
165	Corynebacterium diphtheriae CDCE 8392	FALSE
166	Corynebacterium diphtheriae HC01	FALSE
167	Corynebacterium diphtheriae HC02	FALSE
168	Corynebacterium diphtheriae HC03	FALSE
169	Corynebacterium diphtheriae HC04	FALSE
170	Corynebacterium diphtheriae INCA 402	FALSE
171	Corynebacterium diphtheriae NCTC 13129	FALSE
172	Corynebacterium diphtheriae PW8	FALSE
173	Corynebacterium diphtheriae VA01	FALSE
174	Corynebacterium doosanense CAU 212 DSM 45436	FALSE
175	Corynebacterium efficiens YS314	FALSE
176	Corynebacterium epidermidicanis	FALSE
177	Corynebacterium falsenii DSM 44353	FALSE
178	Corynebacterium flavescens	FALSE
179	Corynebacterium frankenforstense DSM 45800	FALSE
180	Corynebacterium glaucum	FALSE
181	Corynebacterium glutamicum	FALSE
182	Corynebacterium glutamicum ATCC 13032	FALSE
183	Corynebacterium glutamicum ATCC 14067	FALSE
184	Corynebacterium glutamicum K051	FALSE
185	Corynebacterium glutamicum MB001	FALSE
186	Corynebacterium glutamicum R	FALSE
187	Corynebacterium glutamicum SCgG1	FALSE
188	Corynebacterium glutamicum SCgG2	FALSE
189	Corynebacterium glutamicum ZL6	FALSE
190	Corynebacterium glyciniphilum AJ 3170	FALSE
191	Corynebacterium halotolerans YIM 70093 DSM 44683	FALSE
192	Corynebacterium humireducens NBRC 106098 DSM 45392	FALSE
193	Corynebacterium imitans	FALSE
194	Corynebacterium jeikeium	FALSE
195	Corynebacterium jeikeium K411	FALSE
196	Corynebacterium kroppenstedtii DSM 44385	FALSE
197	Corynebacterium kutscheri	FALSE
198	Corynebacterium lactis RW25	FALSE
199	Corynebacterium marinum DSM 44953	FALSE
200	Corynebacterium maris DSM 45190	FALSE
201	Corynebacterium mustelae	FALSE
202	Corynebacterium phocae	FALSE
203	Corynebacterium pseudotuberculosis	FALSE
204	Corynebacterium pseudotuberculosis 1002	FALSE
205	Corynebacterium pseudotuberculosis 106A	FALSE
206	Corynebacterium pseudotuberculosis 258	FALSE
207	Corynebacterium pseudotuberculosis 267	FALSE
208	Corynebacterium pseudotuberculosis 31	FALSE
209	Corynebacterium pseudotuberculosis 316	FALSE
210	Corynebacterium pseudotuberculosis 3995	FALSE
211	Corynebacterium pseudotuberculosis 4202A	FALSE
212	Corynebacterium pseudotuberculosis C231	FALSE
213	Corynebacterium pseudotuberculosis CIP 5297	FALSE
214	Corynebacterium pseudotuberculosis Cp162	FALSE
215	Corynebacterium pseudotuberculosis FRC41	FALSE
216	Corynebacterium pseudotuberculosis I19	FALSE
217	Corynebacterium pseudotuberculosis P54B96	FALSE
218	Corynebacterium pseudotuberculosis PAT10	FALSE
219	Corynebacterium resistens DSM 45100	FALSE
220	Corynebacterium simulans	FALSE
221	Corynebacterium singulare	FALSE
222	Corynebacterium sp ATCC 6931	FALSE
223	Corynebacterium sp NML980116	FALSE
224	Corynebacterium sphenisci DSM 44792	FALSE
225	Corynebacterium stationis	FALSE
226	Corynebacterium striatum	FALSE
227	Corynebacterium terpenotabidum Y11	FALSE
228	Corynebacterium testudinoris	FALSE
229	Corynebacterium ulcerans	FALSE
230	Corynebacterium ulcerans 0102	FALSE
231	Corynebacterium ulcerans 809	FALSE
232	Corynebacterium ulcerans BRAD22	FALSE
233	Corynebacterium ulcerans FRC11	FALSE
234	Corynebacterium ulcerans FRC58	FALSE
235	Corynebacterium urealyticum	FALSE
236	Corynebacterium urealyticum DSM 7109	FALSE
237	Corynebacterium urealyticum DSM 7111	FALSE
238	Corynebacterium ureicelerivorans	FALSE
239	Corynebacterium uterequi	FALSE
240	Corynebacterium variabile DSM 44702	FALSE
241	Corynebacterium vitaeruminis DSM 20294	FALSE
242	Cryobacterium arcticum	FALSE
243	Cryobacterium sp LW097	FALSE
244	Cryptobacterium curtum DSM 15641	TRUE
245	Curtobacterium sp BH211	FALSE
246	Curtobacterium sp MR_MD2014	FALSE
247	Cutibacterium acnes	FALSE
248	Cutibacterium avidum	FALSE
249	Cutibacterium avidum 44067	FALSE
250	Cutibacterium granulosum	FALSE
251	Denitrobacterium detoxificans	FALSE
252	Dermabacter vaginalis	FALSE
253	Dermacoccus nishinomiyaensis	FALSE
254	Dermatophilus congolensis	FALSE
255	Dietzia timorensis	FALSE
256	Eggerthella lenta DSM 2243	TRUE
257	Eggerthella sp YY7918	TRUE
258	Frankia alni ACN14a	TRUE
259	Frankia casuarinae	TRUE
260	Frankia inefficax	TRUE
261	Frankia sp EAN1pec	TRUE
262	Frankia symbiont of Datisca glomerata	TRUE
263	Frondihabitans sp PAMC 28766	FALSE
264	Gardnerella vaginalis	FALSE
265	Gardnerella vaginalis 40905	FALSE
266	Gardnerella vaginalis ATCC 14018 JCM 11026	FALSE
267	Gardnerella vaginalis ATCC 14019	FALSE
268	Gardnerella vaginalis HMP9231	FALSE
269	Geodermatophilus obscurus DSM 43160	TRUE
270	Glutamicibacter arilaitensis	FALSE
271	Glutamicibacter arilaitensis Re117	FALSE
272	Gordonia bronchialis DSM 43247	FALSE
273	Gordonia polyisoprenivorans VH2	FALSE
274	Gordonia sp KTR9	FALSE
275	Gordonia sp QH11	FALSE
276	Gordonia terrae	FALSE
277	Hoyosella subflava DQS39A1	FALSE
278	Ilumatobacter coccineus YM16304	FALSE
279	Intrasporangium calvum DSM 43043	TRUE
280	Isoptericola dokdonensis DS3	TRUE
281	Isoptericola variabilis 225	TRUE
282	Janibacter indicus	FALSE
283	Jonesia denitrificans	FALSE
284	Jonesia denitrificans DSM 20603	FALSE
285	Kibdelosporangium phytohabitans	TRUE
286	Kineococcus radiotolerans SRS30216 ATCC BAA149	TRUE
287	Kitasatospora albolonga	TRUE
288	Kitasatospora setae KM6054	TRUE
289	Kocuria flava	FALSE
290	Kocuria palustris	FALSE
291	Kocuria rhizophila	FALSE
292	Kocuria rhizophila DC2201	FALSE
293	Kribbella flavida DSM 17836	TRUE
294	Kutzneria albida DSM 43870	TRUE
295	Kytococcus sedentarius DSM 20547	FALSE
296	Lawsonella clevelandensis	TRUE
297	Leifsonia xyli	FALSE
298	Leifsonia xyli subsp cynodontis DSM 46306	FALSE
299	Leifsonia xyli subsp xyli str CTCB07	FALSE
300	Lentzea guizhouensis	TRUE
301	Luteipulveratus mongoliensis	TRUE
302	Microbacterium aurum	FALSE
303	Microbacterium chocolatum	FALSE
304	Microbacterium paludicola	FALSE
305	Microbacterium sp 15R	FALSE
306	Microbacterium sp BH333	FALSE
307	Microbacterium sp CGR1	FALSE
308	Microbacterium sp No 7	FALSE
309	Microbacterium sp PAMC 28756	FALSE
310	Microbacterium sp XT11	FALSE
311	Microbacterium testaceum StLB037	FALSE
312	Micrococcus luteus NCTC 2665	FALSE
313	Microlunatus phosphovorus NM1	FALSE
314	Micromonospora aurantiaca ATCC 27029	TRUE
315	Micromonospora sp L5	TRUE
316	Microterricola viridarii	FALSE
317	Mobiluncus curtisii ATCC 43063	FALSE
318	Modestobacter marinus	FALSE
319	Mycobacterium abscessus	FALSE
320	Mycobacterium abscessus subsp abscessus	FALSE
321	Mycobacterium abscessus subsp bolletii	FALSE
322	Mycobacterium abscessus subsp bolletii 103	FALSE
323	Mycobacterium abscessus subsp bolletii 50594	FALSE
324	Mycobacterium abscessus subsp bolletii CCUG 48898 JCM 15300	FALSE
325	Mycobacterium abscessus subsp bolletii str GO 06	FALSE
326	Mycobacterium abscessus subsp massiliense	FALSE
327	Mycobacterium abscessus UC22	FALSE
328	Mycobacterium africanum	FALSE
329	Mycobacterium africanum GM041182	FALSE
330	Mycobacterium avium	FALSE
331	Mycobacterium avium 104	FALSE
332	Mycobacterium avium subsp avium	FALSE
333	Mycobacterium avium subsp avium 2285 R	FALSE
334	Mycobacterium avium subsp avium 2285 S	FALSE
335	Mycobacterium avium subsp hominissuis	FALSE
336	Mycobacterium avium subsp hominissuis TH135	FALSE
337	Mycobacterium avium subsp paratuberculosis	FALSE
338	Mycobacterium avium subsp paratuberculosis K10	FALSE
339	Mycobacterium avium subsp paratuberculosis MAP4	FALSE
340	Mycobacterium bovis	FALSE
341	Mycobacterium bovis AF212297	FALSE
342	Mycobacterium bovis BCG	FALSE
343	Mycobacterium bovis BCG str ATCC 35743	FALSE
344	Mycobacterium bovis BCG str Korea 1168P	FALSE
345	Mycobacterium bovis BCG str Mexico	FALSE
346	Mycobacterium bovis BCG str Moreau RDJ	FALSE
347	Mycobacterium bovis BCG str Pasteur 1173P2	FALSE
348	Mycobacterium bovis BCG str Tokyo 172	FALSE
349	Mycobacterium canettii CIPT 140010059	FALSE
350	Mycobacterium chelonae CCUG 47445	FALSE
351	Mycobacterium chimaera	FALSE
352	Mycobacterium chubuense NBB4	FALSE
353	Mycobacterium dioxanotrophicus	FALSE
354	Mycobacterium fortuitum	FALSE
355	Mycobacterium gilvum PYRGCK	FALSE
356	Mycobacterium gilvum Spyr1	FALSE
357	Mycobacterium goodii	FALSE
358	Mycobacterium haemophilum DSM 44634	FALSE
359	Mycobacterium immunogenum	FALSE
360	Mycobacterium indicus pranii MTCC 9506	FALSE
361	Mycobacterium intracellulare	FALSE
362	Mycobacterium intracellulare 1956	FALSE
363	Mycobacterium intracellulare ATCC 13950	FALSE
364	Mycobacterium intracellulare MOTT02	FALSE
365	Mycobacterium intracellulare MOTT64	FALSE
366	Mycobacterium kansasii 662	FALSE
367	Mycobacterium kansasii 824	FALSE
368	Mycobacterium kansasii ATCC 12478	FALSE
369	Mycobacterium leprae Br4923	FALSE
370	Mycobacterium leprae TN	FALSE
371	Mycobacterium lepraemurium	FALSE
372	Mycobacterium liflandii 128FXT	FALSE
373	Mycobacterium litorale	FALSE
374	Mycobacterium marinum E11	FALSE
375	Mycobacterium marinum M	FALSE
376	Mycobacterium marseillense	FALSE
377	Mycobacterium microti	FALSE
378	Mycobacterium neoaurum VKM Ac1815D	FALSE
379	Mycobacterium phlei	FALSE
380	Mycobacterium rhodesiae NBB3	FALSE
381	Mycobacterium saopaulense	FALSE
382	Mycobacterium sinense	FALSE
383	Mycobacterium smegmatis	FALSE
384	Mycobacterium smegmatis str MC2 155	FALSE
385	Mycobacterium sp djl10	FALSE
386	Mycobacterium sp EPa45	FALSE
387	Mycobacterium sp JLS	FALSE
388	Mycobacterium sp JS623	FALSE
389	Mycobacterium sp KMS	FALSE
390	Mycobacterium sp MCS	FALSE
391	Mycobacterium sp MOTT36Y	FALSE
392	Mycobacterium sp NRRL B3805	FALSE
393	Mycobacterium sp QIA37	FALSE
394	Mycobacterium sp VKM Ac1817D	FALSE
395	Mycobacterium sp WY10	FALSE
396	Mycobacterium sp YCRL4	FALSE
397	Mycobacterium terrae	FALSE
398	Mycobacterium thermoresistibile	FALSE
399	Mycobacterium tuberculosis	FALSE
400	Mycobacterium tuberculosis 4902	FALSE
401	Mycobacterium tuberculosis 719999	FALSE
402	Mycobacterium tuberculosis BT1	FALSE
403	Mycobacterium tuberculosis BT2	FALSE
404	Mycobacterium tuberculosis CASNITR204	FALSE
405	Mycobacterium tuberculosis CCDC5079	FALSE
406	Mycobacterium tuberculosis CCDC5180	FALSE
407	Mycobacterium tuberculosis CDC1551	FALSE
408	Mycobacterium tuberculosis CTRI2	FALSE
409	Mycobacterium tuberculosis EAI5	FALSE
410	Mycobacterium tuberculosis EAI5NITR206	FALSE
411	Mycobacterium tuberculosis F11	FALSE
412	Mycobacterium tuberculosis H37Ra	FALSE
413	Mycobacterium tuberculosis H37Rv	FALSE
414	Mycobacterium tuberculosis H37RvSiena	FALSE
415	Mycobacterium tuberculosis HKBS1	FALSE
416	Mycobacterium tuberculosis K	FALSE
417	Mycobacterium tuberculosis KZN 1435	FALSE
418	Mycobacterium tuberculosis KZN 4207	FALSE
419	Mycobacterium tuberculosis KZN 605	FALSE
420	Mycobacterium tuberculosis RGTB327	FALSE
421	Mycobacterium tuberculosis RGTB423	FALSE
422	Mycobacterium tuberculosis str BeijingNITR203	FALSE
423	Mycobacterium tuberculosis str Erdman ATCC 35801	FALSE
424	Mycobacterium tuberculosis str Haarlem	FALSE
425	Mycobacterium tuberculosis str HaarlemNITR202	FALSE
426	Mycobacterium tuberculosis str Kurono	FALSE
427	Mycobacterium tuberculosis W148	FALSE
428	Mycobacterium ulcerans Agy99	FALSE
429	Mycobacterium vaccae 95051	FALSE
430	Mycobacterium vanbaalenii PYR1	FALSE
431	Mycobacterium yongonense	FALSE
432	Mycobacterium yongonense 051390	FALSE
433	Nakamurella multipartita DSM 44233	FALSE
434	Neomicrococcus aestuarii	FALSE
435	Nocardia brasiliensis	TRUE
436	Nocardia brasiliensis ATCC 700358	TRUE
437	Nocardia cyriacigeorgica GUH2	TRUE
438	Nocardia farcinica	TRUE
439	Nocardia farcinica IFM 10152	TRUE
440	Nocardia nova SH22a	TRUE
441	Nocardia seriolae	TRUE
442	Nocardia soli	TRUE
443	Nocardioides dokdonensis FR1436	TRUE
444	Nocardioides sp JS614	TRUE
445	Nocardiopsis alba ATCC BAA2165	TRUE
446	Nocardiopsis dassonvillei	TRUE
447	Nocardiopsis dassonvillei subsp dassonvillei DSM 43111	TRUE
448	Nocardiopsis gilva YIM 90087	TRUE
449	Nonomuraea sp ATCC 55076	TRUE
450	Olsenella sp oral taxon 807	FALSE
451	Olsenella uli DSM 7084	FALSE
452	Paenarthrobacter aurescens TC1	FALSE
453	Parascardovia denticolens DSM 10105 JCM 12538	FALSE
454	Pimelobacter simplex	FALSE
455	Plantactinospora sp KBS50	TRUE
456	Prauserella marina	TRUE
457	Propionibacterium acnes 266	FALSE
458	Propionibacterium acnes 6609	FALSE
459	Propionibacterium acnes C1	FALSE
460	Propionibacterium acnes hdn1	FALSE
461	Propionibacterium acnes HL096PA1	FALSE
462	Propionibacterium acnes KPA171202	FALSE
463	Propionibacterium acnes SK137	FALSE
464	Propionibacterium acnes subsp defendens ATCC 11828	FALSE
465	Propionibacterium acnes TypeIA2 Pacn17	FALSE
466	Propionibacterium acnes TypeIA2 Pacn31	FALSE
467	Propionibacterium acnes TypeIA2 Pacn33	FALSE
468	Propionibacterium freudenreichii	FALSE
469	Propionibacterium freudenreichii subsp freudenreichii	FALSE
470	Propionibacterium freudenreichii subsp shermanii	FALSE
471	Propionibacterium freudenreichii subsp shermanii CIRMBIA1	FALSE
472	Propionibacterium sp oral taxon 193	FALSE
473	Pseudarthrobacter chlorophenolicus A6	FALSE
474	Pseudarthrobacter phenanthrenivorans Sphe3	FALSE
475	Pseudarthrobacter sulfonivorans	FALSE
476	Pseudonocardia dioxanivorans CB1190	TRUE
477	Pseudonocardia sp AL04100510	TRUE
478	Pseudonocardia sp EC08061009	TRUE
479	Pseudonocardia sp EC08061901	TRUE
480	Pseudonocardia sp EC08062504	TRUE
481	Pseudonocardia sp HH13062909	TRUE
482	Pseudonocardia sp HH13063007	TRUE
483	Pseudopropionibacterium propionicum F0230a	FALSE
484	Rathayibacter toxicus	FALSE
485	Rathayibacter tritici	FALSE
486	Renibacterium salmoninarum ATCC 33209	FALSE
487	Rhodococcus aetherivorans	TRUE
488	Rhodococcus equi 103S	TRUE
489	Rhodococcus erythropolis	TRUE
490	Rhodococcus erythropolis CCM2595	TRUE
491	Rhodococcus erythropolis PR4	TRUE
492	Rhodococcus erythropolis R138	TRUE
493	Rhodococcus fascians D188	TRUE
494	Rhodococcus jostii RHA1	TRUE
495	Rhodococcus opacus	TRUE
496	Rhodococcus opacus B4	TRUE
497	Rhodococcus opacus PD630	TRUE
498	Rhodococcus pyridinivorans SB3094	TRUE
499	Rhodococcus rhodochrous	TRUE
500	Rhodococcus sp 008	TRUE
501	Rhodococcus sp 2G	TRUE
502	Rhodococcus sp B7740	TRUE
503	Rhodococcus sp BH4	TRUE
504	Rhodococcus sp MTM3W52	TRUE
505	Rhodococcus sp p52	TRUE
506	Rhodococcus sp PBTS 1	TRUE
507	Rhodococcus sp PBTS 2	TRUE
508	Rhodococcus sp WB1	TRUE
509	Rhodococcus sp WMMA185	TRUE
510	Rhodoluna lacicola	FALSE
511	Rothia dentocariosa ATCC 17931	FALSE
512	Rothia mucilaginosa	FALSE
513	Rothia mucilaginosa DY18	FALSE
514	Rubrobacter radiotolerans	FALSE
515	Rubrobacter xylanophilus DSM 9941	FALSE
516	Saccharomonospora viridis DSM 43017	TRUE
517	Saccharopolyspora erythraea NRRL 2338	TRUE
518	Saccharothrix espanaensis DSM 44229	TRUE
519	Salinispora arenicola CNS205	TRUE
520	Salinispora tropica CNB440	TRUE
521	Sanguibacter keddieii DSM 10542	FALSE
522	Scardovia inopinata JCM 12537	FALSE
523	Segniliparus rotundus DSM 44985	FALSE
524	Serinicoccus sp JLT9	FALSE
525	Sinomonas atrocyanea	FALSE
526	Slackia heliotrinireducens DSM 20476	FALSE
527	Stackebrandtia nassauensis DSM 44728	TRUE
528	Streptomyces albireticuli	TRUE
529	Streptomyces alboflavus	TRUE
530	Streptomyces albulus	TRUE
531	Streptomyces albulus ZPM	TRUE
532	Streptomyces albus	TRUE
533	Streptomyces albus J1074	TRUE
534	Streptomyces ambofaciens	TRUE
535	Streptomyces ambofaciens ATCC 23877	TRUE
536	Streptomyces aureofaciens	TRUE
537	Streptomyces autolyticus	TRUE
538	Streptomyces avermitilis MA4680 NBRC 14893	TRUE
539	Streptomyces bingchenggensis BCW1	TRUE
540	Streptomyces cattleya NRRL 8057 DSM 46488	TRUE
541	Streptomyces clavuligerus	TRUE
542	Streptomyces coelicolor A32	TRUE
543	Streptomyces collinus Tu 365	TRUE
544	Streptomyces cyaneogriseus subsp noncyanogenus	TRUE
545	Streptomyces fulvissimus DSM 40593	TRUE
546	Streptomyces gilvosporeus	TRUE
547	Streptomyces glaucescens	TRUE
548	Streptomyces globisporus C1027	TRUE
549	Streptomyces griseochromogenes	TRUE
550	Streptomyces griseus subsp griseus NBRC 13350	TRUE
551	Streptomyces hygroscopicus	TRUE
552	Streptomyces hygroscopicus subsp jinggangensis 5008	TRUE
553	Streptomyces hygroscopicus subsp jinggangensis TL01	TRUE
554	Streptomyces hygroscopicus subsp limoneus	TRUE
555	Streptomyces leeuwenhoekii	TRUE
556	Streptomyces lincolnensis	TRUE
557	Streptomyces lividans TK24	TRUE
558	Streptomyces lydicus	TRUE
559	Streptomyces niveus	TRUE
560	Streptomyces noursei ATCC 11455	TRUE
561	Streptomyces pactum	TRUE
562	Streptomyces parvulus	TRUE
563	Streptomyces pluripotens	TRUE
564	Streptomyces pratensis ATCC 33331	TRUE
565	Streptomyces pristinaespiralis	TRUE
566	Streptomyces puniciscabiei	TRUE
567	Streptomyces reticuli	TRUE
568	Streptomyces rubrolavendulae	TRUE
569	Streptomyces scabiei 8722	TRUE
570	Streptomyces silaceus	TRUE
571	Streptomyces sp 4F	TRUE
572	Streptomyces sp 769	TRUE
573	Streptomyces sp CCM_MD2014	TRUE
574	Streptomyces sp CdTB01	TRUE
575	Streptomyces sp CFMR 7	TRUE
576	Streptomyces sp CLI2509	TRUE
577	Streptomyces sp CNQ509	TRUE
578	Streptomyces sp fd1xmd	TRUE
579	Streptomyces sp FR008	TRUE
580	Streptomyces sp Mg1	TRUE
581	Streptomyces sp MOE7	TRUE
582	Streptomyces sp PAMC 26508	TRUE
583	Streptomyces sp S102016	TRUE
584	Streptomyces sp S8	TRUE
585	Streptomyces sp SAT1	TRUE
586	Streptomyces sp SCSIO 03032	TRUE
587	Streptomyces sp Sge12	TRUE
588	Streptomyces sp SirexAAE	TRUE
589	Streptomyces sp TN58	TRUE
590	Streptomyces sp Tue 6075	TRUE
591	Streptomyces venezuelae	TRUE
592	Streptomyces vietnamensis	TRUE
593	Streptomyces violaceoruber	TRUE
594	Streptomyces violaceusniger Tu 4113	TRUE
595	Streptomyces xiamenensis	TRUE
596	Streptosporangium roseum DSM 43021	TRUE
597	Tessaracoccus flavescens	FALSE
598	Tessaracoccus flavus	FALSE
599	Tessaracoccus sp NSG39	FALSE
600	Tessaracoccus sp T2530	FALSE
601	Thermobifida fusca YX	TRUE
602	Thermobispora bispora DSM 43833	TRUE
603	Thermomonospora curvata DSM 43183	TRUE
604	Tropheryma whipplei str Twist	FALSE
605	Tropheryma whipplei TW0827	FALSE
606	Trueperella pyogenes	FALSE
607	Trueperella pyogenes TP8	FALSE
608	Tsukamurella paurometabola DSM 20162	TRUE
609	Verrucosispora maris AB18032	TRUE
610	Xylanimonas cellulosilytica DSM 15894	FALSE
611	Acetoanaerobium sticklandii	FALSE
612	Acetobacterium woodii DSM 1030	FALSE
613	Acetohalobium arabaticum DSM 5501	FALSE
614	Acidaminococcus fermentans DSM 20731	FALSE
615	Acidaminococcus intestini RyCMR95	FALSE
616	Aeribacillus pallidus	FALSE
617	Aerococcus christensenii	FALSE
618	Aerococcus sanguinicola	FALSE
619	Aerococcus urinae	FALSE
620	Aerococcus urinae ACS120VCol10a	FALSE
621	Aerococcus urinaeequi	FALSE
622	Aerococcus urinaehominis	FALSE
623	Aerococcus viridans	FALSE
624	Alicyclobacillus acidocaldarius subsp acidocaldarius DSM 446	FALSE
625	Alicyclobacillus acidocaldarius subsp acidocaldarius Tc41	FALSE
626	Alkaliphilus metalliredigens QYMF	FALSE
627	Alkaliphilus oremlandii OhILAs	FALSE
628	Ammonifex degensii KC4	FALSE
629	Amphibacillus xylanus NBRC 15112	FALSE
630	Anaerococcus prevotii DSM 20548	TRUE
631	Anaerostipes hadrus	FALSE
632	Aneurinibacillus sp XH2	FALSE
633	Anoxybacillus amylolyticus	FALSE
634	Anoxybacillus flavithermus	FALSE
635	Anoxybacillus flavithermus WK1	FALSE
636	Anoxybacillus gonensis	FALSE
637	Anoxybacillus sp B2M1	FALSE
638	Anoxybacillus sp B7M1	FALSE
639	Bacillus amyloliquefaciens	FALSE
640	Bacillus amyloliquefaciens CC178	FALSE
641	Bacillus amyloliquefaciens DSM 7	FALSE
642	Bacillus amyloliquefaciens IT45	FALSE
643	Bacillus amyloliquefaciens KHG19	FALSE
644	Bacillus amyloliquefaciens LFB112	FALSE
645	Bacillus amyloliquefaciens LL3	FALSE
646	Bacillus amyloliquefaciens TA208	FALSE
647	Bacillus amyloliquefaciens UMAF6614	FALSE
648	Bacillus amyloliquefaciens UMAF6639	FALSE
649	Bacillus amyloliquefaciens XH7	FALSE
650	Bacillus amyloliquefaciens Y2	FALSE
651	Bacillus anthracis	FALSE
652	Bacillus anthracis str A0248	FALSE
653	Bacillus anthracis str A16	FALSE
654	Bacillus anthracis str A16R	FALSE
655	Bacillus anthracis str Ames	FALSE
656	Bacillus anthracis str Ames Ancestor	FALSE
657	Bacillus anthracis str CDC 684	FALSE
658	Bacillus anthracis str H9401	FALSE
659	Bacillus anthracis str Sterne	FALSE
660	Bacillus anthracis str SVA11	FALSE
661	Bacillus anthracis str Turkey32	FALSE
662	Bacillus anthracis str V770NP1R	FALSE
663	Bacillus anthracis str Vollum	FALSE
664	Bacillus atrophaeus	FALSE
665	Bacillus atrophaeus 1942	FALSE
666	Bacillus beveridgei	FALSE
667	Bacillus bombysepticus str Wang	FALSE
668	Bacillus cellulosilyticus DSM 2522	FALSE
669	Bacillus cereus	FALSE
670	Bacillus cereus 03BB102	FALSE
671	Bacillus cereus 03BB108	FALSE
672	Bacillus cereus AH187	FALSE
673	Bacillus cereus AH820	FALSE
674	Bacillus cereus ATCC 10987	FALSE
675	Bacillus cereus ATCC 14579	FALSE
676	Bacillus cereus ATCC 4342	FALSE
677	Bacillus cereus B4264	FALSE
678	Bacillus cereus biovar anthracis str CI	FALSE
679	Bacillus cereus D17	FALSE
680	Bacillus cereus E33L	FALSE
681	Bacillus cereus F83776	FALSE
682	Bacillus cereus FRI35	FALSE
683	Bacillus cereus G9241	FALSE
684	Bacillus cereus G9842	FALSE
685	Bacillus cereus NC7401	FALSE
686	Bacillus cereus Q1	FALSE
687	Bacillus clausii	NA
688	Bacillus clausii KSMK16	NA
689	Bacillus coagulans	FALSE
690	Bacillus coagulans 26	FALSE
691	Bacillus coagulans 36D1	FALSE
692	Bacillus coagulans DSM 1 ATCC 7050	FALSE
693	Bacillus cohnii	FALSE
694	Bacillus cytotoxicus NVH 39198	FALSE
695	Bacillus endophyticus	FALSE
696	Bacillus flexus	FALSE
697	Bacillus gibsonii	NA
698	Bacillus glycinifermentans	FALSE
699	Bacillus halodurans C125	FALSE
700	Bacillus horikoshii	FALSE
701	Bacillus infantis NRRL B14911	FALSE
702	Bacillus kochii	FALSE
703	Bacillus krulwichiae	FALSE
704	Bacillus lehensis G1	NA
705	Bacillus licheniformis	FALSE
706	Bacillus licheniformis DSM 13 ATCC 14580	FALSE
707	Bacillus megaterium	FALSE
708	Bacillus megaterium DSM 319	FALSE
709	Bacillus megaterium NBRC 15308 ATCC 14581	FALSE
710	Bacillus megaterium Q3	FALSE
711	Bacillus megaterium QM B1551	FALSE
712	Bacillus megaterium WSH002	FALSE
713	Bacillus methanolicus MGA3	FALSE
714	Bacillus muralis	FALSE
715	Bacillus mycoides	TRUE
716	Bacillus oceanisediminis 2691	FALSE
717	Bacillus paralicheniformis	FALSE
718	Bacillus paralicheniformis ATCC 9945a	FALSE
719	Bacillus pseudofirmus OF4	NA
720	Bacillus pumilus	FALSE
721	Bacillus pumilus SAFR032	FALSE
722	Bacillus safensis	NA
723	Bacillus selenitireducens MLS10	FALSE
724	Bacillus simplex	FALSE
725	Bacillus simplex NBRC 15720 DSM 1321	FALSE
726	Bacillus smithii	FALSE
727	Bacillus sonorensis	FALSE
728	Bacillus sp	NA
729	Bacillus sp 1NLA3E	NA
730	Bacillus sp 1s1	NA
731	Bacillus sp 275	NA
732	Bacillus sp ABP14	NA
733	Bacillus sp BH072	NA
734	Bacillus sp FDAARGOS_235	NA
735	Bacillus sp FJAT14266	NA
736	Bacillus sp H151	NA
737	Bacillus sp IHB B 7164	NA
738	Bacillus sp JS	NA
739	Bacillus sp LM 42	NA
740	Bacillus sp MD5	NA
741	Bacillus sp OxB1	NA
742	Bacillus sp Pc3	NA
743	Bacillus sp SDLI1	NA
744	Bacillus sp WP8	NA
745	Bacillus sp X12014	NA
746	Bacillus sp YP1	NA
747	Bacillus subtilis	FALSE
748	Bacillus subtilis BEST7003	FALSE
749	Bacillus subtilis BEST7613	FALSE
750	Bacillus subtilis BSn5	FALSE
751	Bacillus subtilis HJ5	FALSE
752	Bacillus subtilis KCTC 1028	FALSE
753	Bacillus subtilis PY79	FALSE
754	Bacillus subtilis QB928	FALSE
755	Bacillus subtilis subsp globigii	FALSE
756	Bacillus subtilis subsp inaquosorum	FALSE
757	Bacillus subtilis subsp natto	FALSE
758	Bacillus subtilis subsp natto BEST195	FALSE
759	Bacillus subtilis subsp spizizenii	FALSE
760	Bacillus subtilis subsp spizizenii str W23	FALSE
761	Bacillus subtilis subsp spizizenii TUB10	FALSE
762	Bacillus subtilis subsp subtilis	FALSE
763	Bacillus subtilis subsp subtilis 6051HGW	FALSE
764	Bacillus subtilis subsp subtilis str 168	FALSE
765	Bacillus subtilis subsp subtilis str AG1839	FALSE
766	Bacillus subtilis subsp subtilis str BAB1	FALSE
767	Bacillus subtilis subsp subtilis str BSP1	FALSE
768	Bacillus subtilis subsp subtilis str JH642 substr AG174	FALSE
769	Bacillus subtilis subsp subtilis str OH 1311	FALSE
770	Bacillus subtilis subsp subtilis str RONN1	FALSE
771	Bacillus subtilis TOA	FALSE
772	Bacillus subtilis XF1	FALSE
773	Bacillus thuringiensis	FALSE
774	Bacillus thuringiensis BMB171	FALSE
775	Bacillus thuringiensis Bt18247	FALSE
776	Bacillus thuringiensis Bt407	FALSE
777	Bacillus thuringiensis HD1002	FALSE
778	Bacillus thuringiensis HD771	FALSE
779	Bacillus thuringiensis HD789	FALSE
780	Bacillus thuringiensis MC28	FALSE
781	Bacillus thuringiensis serovar alesti	FALSE
782	Bacillus thuringiensis serovar chinensis CT43	FALSE
783	Bacillus thuringiensis serovar coreanensis	FALSE
784	Bacillus thuringiensis serovar finitimus YBT020	FALSE
785	Bacillus thuringiensis serovar galleriae	FALSE
786	Bacillus thuringiensis serovar indiana	FALSE
787	Bacillus thuringiensis serovar konkukian str 9727	FALSE
788	Bacillus thuringiensis serovar kurstaki str HD1	FALSE
789	Bacillus thuringiensis serovar kurstaki str HD73	FALSE
790	Bacillus thuringiensis serovar kurstaki str YBT1520	FALSE
791	Bacillus thuringiensis serovar morrisoni	FALSE
792	Bacillus thuringiensis serovar thuringiensis str IS5056	FALSE
793	Bacillus thuringiensis serovar tolworthi	FALSE
794	Bacillus thuringiensis str Al Hakam	FALSE
795	Bacillus thuringiensis YBT1518	FALSE
796	Bacillus toyonensis BCT7112	FALSE
797	Bacillus vallismortis	FALSE
798	Bacillus velezensis	FALSE
799	Bacillus velezensis AS433	FALSE
800	Bacillus velezensis CAU B946	FALSE
801	Bacillus velezensis FZB42	FALSE
802	Bacillus velezensis NAUB3	FALSE
803	Bacillus velezensis NJN6	FALSE
804	Bacillus velezensis SQR9	FALSE
805	Bacillus velezensis TrigoCor1448	FALSE
806	Bacillus velezensis UCMB5033	FALSE
807	Bacillus velezensis UCMB5036	FALSE
808	Bacillus velezensis UCMB5113	FALSE
809	Bacillus velezensis YAU B9601Y2	FALSE
810	Bacillus weihaiensis	NA
811	Bacillus weihenstephanensis	NA
812	Bacillus weihenstephanensis KBAB4	NA
813	Bacillus xiamenensis	FALSE
814	Blautia sp YL58	FALSE
815	Brevibacillus brevis NBRC 100599	FALSE
816	Brevibacillus formosus	FALSE
817	Brevibacillus laterosporus LMG 15441	FALSE
818	Butyrivibrio hungatei	FALSE
819	Butyrivibrio proteoclasticus B316	FALSE
820	Caldanaerobacter subterraneus subsp tengcongensis MB4	FALSE
821	Caldicellulosiruptor bescii DSM 6725	FALSE
822	Caldicellulosiruptor hydrothermalis 108	FALSE
823	Caldicellulosiruptor kristjanssonii I77R1B	FALSE
824	Caldicellulosiruptor kronotskyensis 2002	FALSE
825	Caldicellulosiruptor lactoaceticus 6A	FALSE
826	Caldicellulosiruptor obsidiansis OB47	FALSE
827	Caldicellulosiruptor owensensis OL	FALSE
828	Caldicellulosiruptor saccharolyticus DSM 8903	FALSE
829	Candidatus Arthromitus sp SFBmouseJapan	NA
830	Candidatus Arthromitus sp SFBmouseNL	NA
831	Candidatus Arthromitus sp SFBmouseYit	NA
832	Candidatus Arthromitus sp SFBratYit	NA
833	Candidatus Desulforudis audaxviator MP104C	NA
834	Carboxydothermus hydrogenoformans Z2901	FALSE
835	Carnobacterium inhibens subsp gilichinskyi	FALSE
836	Carnobacterium maltaromaticum LMA28	FALSE
837	Carnobacterium sp 174	FALSE
838	Carnobacterium sp CP1	FALSE
839	Clostridioides difficile	FALSE
840	Clostridioides difficile 630	FALSE
841	Clostridioides difficile ATCC 9689 DSM 1296	FALSE
842	Clostridioides difficile CD196	FALSE
843	Clostridium aceticum	FALSE
844	Clostridium acetobutylicum ATCC 824	FALSE
845	Clostridium acetobutylicum DSM 1731	FALSE
846	Clostridium acetobutylicum EA 2018	FALSE
847	Clostridium acidurici 9a	FALSE
848	Clostridium argentinense	NA
849	Clostridium autoethanogenum DSM 10061	NA
850	Clostridium baratii	FALSE
851	Clostridium baratii str Sullivan	FALSE
852	Clostridium beijerinckii	FALSE
853	Clostridium beijerinckii ATCC 35702	FALSE
854	Clostridium beijerinckii NCIMB 8052	FALSE
855	Clostridium bolteae	FALSE
856	Clostridium bornimense	FALSE
857	Clostridium botulinum	FALSE
858	Clostridium botulinum 202F	FALSE
859	Clostridium botulinum A str ATCC 19397	FALSE
860	Clostridium botulinum A str ATCC 3502	FALSE
861	Clostridium botulinum A str Hall	FALSE
862	Clostridium botulinum A2 str Kyoto	FALSE
863	Clostridium botulinum A3 str Loch Maree	FALSE
864	Clostridium botulinum B str Eklund 17B NRP	FALSE
865	Clostridium botulinum B1 str Okra	FALSE
866	Clostridium botulinum Ba4 str 657	FALSE
867	Clostridium botulinum BKT015925	FALSE
868	Clostridium botulinum CDC_1436	FALSE
869	Clostridium botulinum CDC_297	FALSE
870	Clostridium botulinum E3 str Alaska E43	FALSE
871	Clostridium botulinum F str 230613	FALSE
872	Clostridium botulinum F str Langeland	FALSE
873	Clostridium botulinum H04402 065	FALSE
874	Clostridium butyricum	FALSE
875	Clostridium carboxidivorans P7	FALSE
876	Clostridium cellulolyticum H10	FALSE
877	Clostridium cellulosi	FALSE
878	Clostridium cellulovorans 743B	FALSE
879	Clostridium chauvoei	FALSE
880	Clostridium chauvoei JF4335	FALSE
881	Clostridium clariflavum DSM 19732	FALSE
882	Clostridium cochlearium	FALSE
883	Clostridium estertheticum subsp estertheticum	FALSE
884	Clostridium formicaceticum	FALSE
885	Clostridium kluyveri	FALSE
886	Clostridium kluyveri DSM 555	FALSE
887	Clostridium kluyveri NBRC 12016	FALSE
888	Clostridium lentocellum DSM 5427	FALSE
889	Clostridium ljungdahlii DSM 13528	FALSE
890	Clostridium novyi NT	FALSE
891	Clostridium pasteurianum	FALSE
892	Clostridium pasteurianum BC1	FALSE
893	Clostridium pasteurianum DSM 525 ATCC 6013	FALSE
894	Clostridium pasteurianum NRRL B598	FALSE
895	Clostridium perfringens	FALSE
896	Clostridium perfringens ATCC 13124	FALSE
897	Clostridium perfringens SM101	FALSE
898	Clostridium perfringens str 13	FALSE
899	Clostridium propionicum DSM 1682	FALSE
900	Clostridium saccharobutylicum	FALSE
901	Clostridium saccharobutylicum DSM 13864	FALSE
902	Clostridium saccharolyticum WM1	FALSE
903	Clostridium saccharoperbutylacetonicum	NA
904	Clostridium saccharoperbutylacetonicum N14HMT	NA
905	Clostridium scatologenes	FALSE
906	Clostridium sp BNL1100	NA
907	Clostridium sp SY8519	NA
908	Clostridium sporogenes	FALSE
909	Clostridium stercorarium subsp leptospartum DSM 9219	FALSE
910	Clostridium stercorarium subsp stercorarium DSM 8532	FALSE
911	Clostridium stercorarium subsp thermolacticum DSM 2910	FALSE
912	Clostridium taeniosporum	FALSE
913	Clostridium tetani 12124569	FALSE
914	Clostridium tetani E88	FALSE
915	Clostridium tyrobutyricum	NA
916	Coprothermobacter proteolyticus DSM 5265	FALSE
917	Dehalobacter restrictus DSM 9455	FALSE
918	Dehalobacter sp CF	FALSE
919	Dehalobacter sp DCA	FALSE
920	Desulfitobacterium dehalogenans ATCC 51507	FALSE
921	Desulfitobacterium dichloroeliminans LMG P21439	FALSE
922	Desulfitobacterium hafniense DCB2	FALSE
923	Desulfitobacterium hafniense Y51	FALSE
924	Desulfitobacterium metallireducens DSM 15288	FALSE
925	Desulfosporosinus acidiphilus SJ4	FALSE
926	Desulfosporosinus meridiei DSM 13257	FALSE
927	Desulfosporosinus orientis DSM 765	FALSE
928	Desulfotomaculum acetoxidans DSM 771	FALSE
929	Desulfotomaculum ferrireducens	FALSE
930	Desulfotomaculum gibsoniae DSM 7213	FALSE
931	Desulfotomaculum kuznetsovii DSM 6115	FALSE
932	Desulfotomaculum nigrificans CO1SRB	FALSE
933	Desulfotomaculum reducens MI1	FALSE
934	Desulfotomaculum ruminis DSM 2154	FALSE
935	Dialister pneumosintes	TRUE
936	endosymbiont TC1 of Trimyema compressum	NA
937	Enterococcus casseliflavus EC20	FALSE
938	Enterococcus durans	FALSE
939	Enterococcus faecalis	FALSE
940	Enterococcus faecalis 62	FALSE
941	Enterococcus faecalis ATCC 29212	FALSE
942	Enterococcus faecalis D32	FALSE
943	Enterococcus faecalis DENG1	FALSE
944	Enterococcus faecalis OG1RF	FALSE
945	Enterococcus faecalis str Symbioflor 1	FALSE
946	Enterococcus faecalis V583	FALSE
947	Enterococcus faecium	FALSE
948	Enterococcus faecium Aus0004	FALSE
949	Enterococcus faecium Aus0085	FALSE
950	Enterococcus faecium DO	FALSE
951	Enterococcus faecium NRRL B2354	FALSE
952	Enterococcus faecium T110	FALSE
953	Enterococcus gallinarum	FALSE
954	Enterococcus hirae	FALSE
955	Enterococcus hirae ATCC 9790	FALSE
956	Enterococcus mundtii QU 25	FALSE
957	Enterococcus silesiacus	FALSE
958	Enterococcus thailandicus	FALSE
959	Erysipelothrix rhusiopathiae	FALSE
960	Erysipelothrix rhusiopathiae str Fujisawa	FALSE
961	Erysipelothrix rhusiopathiae SY1027	FALSE
962	Erysipelothrix sp LV19	FALSE
963	Erysipelotrichaceae bacterium I46	NA
964	Ethanoligenens harbinense YUAN3	FALSE
965	Eubacterium eligens ATCC 27750	FALSE
966	Eubacterium hallii	FALSE
967	Eubacterium limosum	FALSE
968	Eubacterium limosum KIST612	FALSE
969	Eubacterium rectale ATCC 33656	FALSE
970	Eubacterium sulci ATCC 35585	FALSE
971	Exiguobacterium antarcticum B7	FALSE
972	Exiguobacterium sibiricum 25515	FALSE
973	Exiguobacterium sp AT1b	FALSE
974	Exiguobacterium sp MH3	FALSE
975	Exiguobacterium sp U131	FALSE
976	Faecalibaculum rodentium	FALSE
977	Fictibacillus arsenicus	FALSE
978	Fictibacillus phosphorivorans	FALSE
979	Filifactor alocis ATCC 35896	FALSE
980	Finegoldia magna ATCC 29328	NA
981	Flavonifractor plautii	FALSE
982	Gemella sp oral taxon 928	FALSE
983	Geobacillus genomosp 3	FALSE
984	Geobacillus kaustophilus HTA426	FALSE
985	Geobacillus lituanicus	FALSE
986	Geobacillus sp 12AMOR1	FALSE
987	Geobacillus sp C56T3	FALSE
988	Geobacillus sp GHH01	FALSE
989	Geobacillus sp JS12	FALSE
990	Geobacillus sp LC300	FALSE
991	Geobacillus sp WCH70	FALSE
992	Geobacillus sp Y412MC52	FALSE
993	Geobacillus sp Y412MC61	FALSE
994	Geobacillus sp Y41MC1	FALSE
995	Geobacillus stearothermophilus	FALSE
996	Geobacillus stearothermophilus 10	FALSE
997	Geobacillus subterraneus	FALSE
998	Geobacillus thermocatenulatus	FALSE
999	Geobacillus thermodenitrificans	FALSE
1000	Geobacillus thermodenitrificans NG802	FALSE
1001	Geobacillus thermoleovorans	FALSE
1002	Geobacillus thermoleovorans CCB_US3_UF5	FALSE
1003	Geosporobacter ferrireducens	FALSE
1004	Halanaerobium hydrogeniformans	FALSE
1005	Halanaerobium praevalens DSM 2228	FALSE
1006	Halobacillus halophilus	FALSE
1007	Halobacillus halophilus DSM 2266	FALSE
1008	Halobacillus mangrovi	FALSE
1009	Halobacteroides halobius DSM 5150	FALSE
1010	Halothermothrix orenii H 168	FALSE
1011	Heliobacterium modesticaldum Ice1	FALSE
1012	Herbinix luporum	NA
1013	Intestinimonas butyriciproducens	FALSE
1014	Jeotgalibaca dankookensis	FALSE
1015	Jeotgalibaca sp PTS2502	FALSE
1016	Jeotgalibacillus malaysiensis	FALSE
1017	Kurthia sp 11kri321	NA
1018	Kyrpidia tusciae DSM 2912	NA
1019	Lachnoclostridium phytofermentans ISDg	NA
1020	Lachnoclostridium sp YL32	NA
1021	Lactobacillus acetotolerans	FALSE
1022	Lactobacillus acidipiscis	FALSE
1023	Lactobacillus acidophilus	FALSE
1024	Lactobacillus acidophilus La14	FALSE
1025	Lactobacillus acidophilus NCFM	FALSE
1026	Lactobacillus agilis	FALSE
1027	Lactobacillus amylolyticus	FALSE
1028	Lactobacillus amylophilus DSM 20533 JCM 1125	FALSE
1029	Lactobacillus amylovorus	FALSE
1030	Lactobacillus amylovorus GRL1118	FALSE
1031	Lactobacillus backii	FALSE
1032	Lactobacillus brevis	FALSE
1033	Lactobacillus brevis ATCC 367	FALSE
1034	Lactobacillus brevis KB290	FALSE
1035	Lactobacillus buchneri CD034	FALSE
1036	Lactobacillus buchneri NRRL B30929	FALSE
1037	Lactobacillus casei	FALSE
1038	Lactobacillus casei 12A	FALSE
1039	Lactobacillus casei BDII	FALSE
1040	Lactobacillus casei BL23	FALSE
1041	Lactobacillus casei LC2W	FALSE
1042	Lactobacillus casei LOCK919	FALSE
1043	Lactobacillus casei str Zhang	FALSE
1044	Lactobacillus casei subsp casei ATCC 393	FALSE
1045	Lactobacillus casei W56	FALSE
1046	Lactobacillus crustorum	FALSE
1047	Lactobacillus curieae	FALSE
1048	Lactobacillus curvatus	FALSE
1049	Lactobacillus delbrueckii subsp bulgaricus	FALSE
1050	Lactobacillus delbrueckii subsp bulgaricus 2038	FALSE
1051	Lactobacillus delbrueckii subsp bulgaricus ATCC 11842 JCM 1002	FALSE
1052	Lactobacillus delbrueckii subsp bulgaricus ATCC BAA365	FALSE
1053	Lactobacillus delbrueckii subsp bulgaricus ND02	FALSE
1054	Lactobacillus delbrueckii subsp delbrueckii	FALSE
1055	Lactobacillus delbrueckii subsp indicus	FALSE
1056	Lactobacillus delbrueckii subsp jakobsenii ZN7a9 DSM 26046	FALSE
1057	Lactobacillus delbrueckii subsp lactis	FALSE
1058	Lactobacillus delbrueckii subsp lactis DSM 20072	FALSE
1059	Lactobacillus delbrueckii subsp sunkii	FALSE
1060	Lactobacillus fermentum	FALSE
1061	Lactobacillus fermentum 3872	FALSE
1062	Lactobacillus fermentum CECT 5716	FALSE
1063	Lactobacillus fermentum F6	FALSE
1064	Lactobacillus fermentum IFO 3956	FALSE
1065	Lactobacillus gallinarum	FALSE
1066	Lactobacillus gasseri	FALSE
1067	Lactobacillus gasseri ATCC 33323 JCM 1131	FALSE
1068	Lactobacillus gasseri DSM 14869	FALSE
1069	Lactobacillus ginsenosidimutans	FALSE
1070	Lactobacillus heilongjiangensis	FALSE
1071	Lactobacillus helveticus	FALSE
1072	Lactobacillus helveticus CNRZ32	FALSE
1073	Lactobacillus helveticus DPC 4571	FALSE
1074	Lactobacillus helveticus H10	FALSE
1075	Lactobacillus helveticus H9	FALSE
1076	Lactobacillus helveticus R0052	FALSE
1077	Lactobacillus hokkaidonensis JCM 18461	FALSE
1078	Lactobacillus jensenii	FALSE
1079	Lactobacillus johnsonii	FALSE
1080	Lactobacillus johnsonii DPC 6026	FALSE
1081	Lactobacillus johnsonii FI9785	FALSE
1082	Lactobacillus johnsonii N62	FALSE
1083	Lactobacillus johnsonii NCC 533	FALSE
1084	Lactobacillus kefiranofaciens ZW3	FALSE
1085	Lactobacillus koreensis	FALSE
1086	Lactobacillus kunkeei	FALSE
1087	Lactobacillus lindneri	FALSE
1088	Lactobacillus mucosae LM1	FALSE
1089	Lactobacillus oris	FALSE
1090	Lactobacillus parabuchneri	FALSE
1091	Lactobacillus paracasei	FALSE
1092	Lactobacillus paracasei ATCC 334	FALSE
1093	Lactobacillus paracasei N1115	FALSE
1094	Lactobacillus paracasei subsp paracasei 87002	FALSE
1095	Lactobacillus paracasei subsp paracasei JCM 8130	FALSE
1096	Lactobacillus paracollinoides	FALSE
1097	Lactobacillus paraplantarum	FALSE
1098	Lactobacillus pentosus	FALSE
1099	Lactobacillus plantarum	FALSE
1100	Lactobacillus plantarum 16	FALSE
1101	Lactobacillus plantarum DOMLa	FALSE
1102	Lactobacillus plantarum JDM1	FALSE
1103	Lactobacillus plantarum subsp plantarum	FALSE
1104	Lactobacillus plantarum subsp plantarum P8	FALSE
1105	Lactobacillus plantarum subsp plantarum STIII	FALSE
1106	Lactobacillus plantarum WCFS1	FALSE
1107	Lactobacillus plantarum ZJ316	FALSE
1108	Lactobacillus reuteri	FALSE
1109	Lactobacillus reuteri ATCC 53608	FALSE
1110	Lactobacillus reuteri DSM 20016	FALSE
1111	Lactobacillus reuteri I5007	FALSE
1112	Lactobacillus reuteri JCM 1112	FALSE
1113	Lactobacillus reuteri SD2112	FALSE
1114	Lactobacillus reuteri TD1	FALSE
1115	Lactobacillus rhamnosus	FALSE
1116	Lactobacillus rhamnosus ATCC 8530	FALSE
1117	Lactobacillus rhamnosus DSM 14870	FALSE
1118	Lactobacillus rhamnosus GG	FALSE
1119	Lactobacillus rhamnosus Lc 705	FALSE
1120	Lactobacillus rhamnosus LOCK900	FALSE
1121	Lactobacillus rhamnosus LOCK908	FALSE
1122	Lactobacillus ruminis ATCC 27782	FALSE
1123	Lactobacillus sakei	FALSE
1124	Lactobacillus sakei subsp sakei 23K	FALSE
1125	Lactobacillus salivarius	FALSE
1126	Lactobacillus salivarius CECT 5713	FALSE
1127	Lactobacillus salivarius str Ren	FALSE
1128	Lactobacillus salivarius UCC118	FALSE
1129	Lactobacillus sanfranciscensis TMW 11304	FALSE
1130	Lactobacillus sp WiKim39	FALSE
1131	Lactobacillus sp wkB8	FALSE
1132	Lactobacillus zymae	FALSE
1133	Lactococcus garvieae ATCC 49156	FALSE
1134	Lactococcus garvieae Lg2	FALSE
1135	Lactococcus lactis	FALSE
1136	Lactococcus lactis subsp cremoris	FALSE
1137	Lactococcus lactis subsp cremoris A76	FALSE
1138	Lactococcus lactis subsp cremoris KW2	FALSE
1139	Lactococcus lactis subsp cremoris MG1363	FALSE
1140	Lactococcus lactis subsp cremoris NZ9000	FALSE
1141	Lactococcus lactis subsp cremoris SK11	FALSE
1142	Lactococcus lactis subsp cremoris UC5099	FALSE
1143	Lactococcus lactis subsp lactis	FALSE
1144	Lactococcus lactis subsp lactis bv diacetylactis	FALSE
1145	Lactococcus lactis subsp lactis CV56	FALSE
1146	Lactococcus lactis subsp lactis Il1403	FALSE
1147	Lactococcus lactis subsp lactis IO1	FALSE
1148	Lactococcus lactis subsp lactis KF147	FALSE
1149	Lactococcus lactis subsp lactis KLDS 40325	FALSE
1150	Lactococcus lactis subsp lactis NCDO 2118	FALSE
1151	Lactococcus piscium MKFS47	FALSE
1152	Lactococcus raffinolactis	FALSE
1153	Lentibacillus amyloliquefaciens	NA
1154	Leuconostoc carnosum JB16	FALSE
1155	Leuconostoc citreum KM20	FALSE
1156	Leuconostoc garlicum	FALSE
1157	Leuconostoc gelidum JB7	FALSE
1158	Leuconostoc gelidum subsp gasicomitatum KG161	FALSE
1159	Leuconostoc gelidum subsp gasicomitatum LMG 18811	FALSE
1160	Leuconostoc kimchii IMSNU 11154	FALSE
1161	Leuconostoc lactis	FALSE
1162	Leuconostoc mesenteroides KFRIMG	FALSE
1163	Leuconostoc mesenteroides subsp dextranicum	FALSE
1164	Leuconostoc mesenteroides subsp jonggajibkimchii	FALSE
1165	Leuconostoc mesenteroides subsp mesenteroides	FALSE
1166	Leuconostoc mesenteroides subsp mesenteroides ATCC 8293	FALSE
1167	Leuconostoc mesenteroides subsp mesenteroides J18	FALSE
1168	Leuconostoc mesenteroides subsp suionicum	FALSE
1169	Leuconostoc sp C2	FALSE
1170	Limnochorda pilosa	NA
1171	Listeria innocua Clip11262	FALSE
1172	Listeria ivanovii subsp ivanovii	FALSE
1173	Listeria ivanovii subsp ivanovii PAM 55	FALSE
1174	Listeria ivanovii subsp londoniensis	FALSE
1175	Listeria ivanovii WSLC3009	FALSE
1176	Listeria monocytogenes	FALSE
1177	Listeria monocytogenes 07PF0776	FALSE
1178	Listeria monocytogenes 085578	FALSE
1179	Listeria monocytogenes 085923	FALSE
1180	Listeria monocytogenes 10403S	FALSE
1181	Listeria monocytogenes 6179	FALSE
1182	Listeria monocytogenes ATCC 19117	FALSE
1183	Listeria monocytogenes EGD	FALSE
1184	Listeria monocytogenes EGDe	FALSE
1185	Listeria monocytogenes Finland 1998	FALSE
1186	Listeria monocytogenes FSL R2561	FALSE
1187	Listeria monocytogenes HCC23	FALSE
1188	Listeria monocytogenes J0161	FALSE
1189	Listeria monocytogenes J1220	FALSE
1190	Listeria monocytogenes J1816	FALSE
1191	Listeria monocytogenes L312	FALSE
1192	Listeria monocytogenes L99	FALSE
1193	Listeria monocytogenes M7	FALSE
1194	Listeria monocytogenes N531	FALSE
1195	Listeria monocytogenes R479a	FALSE
1196	Listeria monocytogenes serotype 12a str 025993	FALSE
1197	Listeria monocytogenes serotype 12a str 045457	FALSE
1198	Listeria monocytogenes serotype 12a str 086056	FALSE
1199	Listeria monocytogenes serotype 12a str 086569	FALSE
1200	Listeria monocytogenes serotype 12a str 086997	FALSE
1201	Listeria monocytogenes serotype 12a str 087374	FALSE
1202	Listeria monocytogenes serotype 12a str 087669	FALSE
1203	Listeria monocytogenes serotype 12a str 100812	FALSE
1204	Listeria monocytogenes serotype 12a str 100813	FALSE
1205	Listeria monocytogenes serotype 12a str 100814	FALSE
1206	Listeria monocytogenes serotype 12a str 100815	FALSE
1207	Listeria monocytogenes serotype 12a str 100933	FALSE
1208	Listeria monocytogenes serotype 12a str 100934	FALSE
1209	Listeria monocytogenes serotype 12a str 101046	FALSE
1210	Listeria monocytogenes serotype 12a str 101047	FALSE
1211	Listeria monocytogenes serotype 12a str 101321	FALSE
1212	Listeria monocytogenes serotype 12a str 104754	FALSE
1213	Listeria monocytogenes serotype 12a str 104758	FALSE
1214	Listeria monocytogenes serotype 12a str 105024	FALSE
1215	Listeria monocytogenes serotype 12a str 880478	FALSE
1216	Listeria monocytogenes serotype 12a str 950093	FALSE
1217	Listeria monocytogenes serotype 12a str 982035	FALSE
1218	Listeria monocytogenes serotype 12a str 996370	FALSE
1219	Listeria monocytogenes serotype 12b str 100810	FALSE
1220	Listeria monocytogenes serotype 12b str 100811	FALSE
1221	Listeria monocytogenes serotype 12c str 105025	FALSE
1222	Listeria monocytogenes serotype 12c str 105026	FALSE
1223	Listeria monocytogenes serotype 3c str 105027	FALSE
1224	Listeria monocytogenes serotype 4b str 021103	FALSE
1225	Listeria monocytogenes serotype 4b str 021289	FALSE
1226	Listeria monocytogenes serotype 4b str 021792	FALSE
1227	Listeria monocytogenes serotype 4b str 026679	FALSE
1228	Listeria monocytogenes serotype 4b str 026680	FALSE
1229	Listeria monocytogenes serotype 4b str 100809	FALSE
1230	Listeria monocytogenes serotype 4b str 810558	FALSE
1231	Listeria monocytogenes serotype 4b str 810592	FALSE
1232	Listeria monocytogenes serotype 4b str 810861	FALSE
1233	Listeria monocytogenes serotype 4b str CLIP 80459	FALSE
1234	Listeria monocytogenes serotype 4b str F2365	FALSE
1235	Listeria monocytogenes serotype 4b str LL195	FALSE
1236	Listeria monocytogenes SLCC2372	FALSE
1237	Listeria monocytogenes SLCC2376	FALSE
1238	Listeria monocytogenes SLCC2378	FALSE
1239	Listeria monocytogenes SLCC2479	FALSE
1240	Listeria monocytogenes SLCC2540	FALSE
1241	Listeria monocytogenes SLCC2755	FALSE
1242	Listeria monocytogenes SLCC5850	FALSE
1243	Listeria monocytogenes SLCC7179	FALSE
1244	Listeria monocytogenes WSLC1001	FALSE
1245	Listeria monocytogenes WSLC1042	FALSE
1246	Listeria seeligeri serovar 12b str SLCC3954	FALSE
1247	Listeria welshimeri	FALSE
1248	Listeria welshimeri serovar 6b str SLCC5334	FALSE
1249	Lysinibacillus fusiformis	FALSE
1250	Lysinibacillus sphaericus	FALSE
1251	Lysinibacillus sphaericus C341	FALSE
1252	Lysinibacillus varians	FALSE
1253	Macrococcus canis	FALSE
1254	Macrococcus caseolyticus	FALSE
1255	Macrococcus caseolyticus JCSC5402	FALSE
1256	Macrococcus sp IME1552	FALSE
1257	Mageeibacillus indolicus UPII95	FALSE
1258	Mahella australiensis 501 BON	FALSE
1259	Marinilactibacillus sp 15R	FALSE
1260	Megamonas hypermegale	FALSE
1261	Megasphaera elsdenii 1414	FALSE
1262	Melissococcus plutonius DAT561	FALSE
1263	Melissococcus plutonius S1	FALSE
1264	Moorella thermoacetica	FALSE
1265	Moorella thermoacetica ATCC 39073	FALSE
1266	Natranaerobius thermophilus JWNMWNLF	FALSE
1267	Novibacillus thermophilus	FALSE
1268	Oceanobacillus iheyensis HTE831	FALSE
1269	Oenococcus oeni PSU1	FALSE
1270	Oscillibacter valericigenes Sjm1820	FALSE
1271	Paenibacillus beijingensis	TRUE
1272	Paenibacillus borealis	TRUE
1273	Paenibacillus bovis	TRUE
1274	Paenibacillus donghaensis	TRUE
1275	Paenibacillus durus	TRUE
1276	Paenibacillus durus ATCC 35681	TRUE
1277	Paenibacillus graminis	TRUE
1278	Paenibacillus kribbensis	TRUE
1279	Paenibacillus larvae subsp larvae	TRUE
1280	Paenibacillus larvae subsp larvae DSM 25430	TRUE
1281	Paenibacillus larvae subsp pulvifaciens	TRUE
1282	Paenibacillus mucilaginosus 3016	TRUE
1283	Paenibacillus mucilaginosus K02	TRUE
1284	Paenibacillus mucilaginosus KNP414	TRUE
1285	Paenibacillus naphthalenovorans	TRUE
1286	Paenibacillus odorifer	TRUE
1287	Paenibacillus peoriae	TRUE
1288	Paenibacillus polymyxa	TRUE
1289	Paenibacillus polymyxa CR1	TRUE
1290	Paenibacillus polymyxa E681	TRUE
1291	Paenibacillus polymyxa M1	TRUE
1292	Paenibacillus polymyxa SC2	TRUE
1293	Paenibacillus polymyxa SQR21	TRUE
1294	Paenibacillus riograndensis SBR5	TRUE
1295	Paenibacillus sabinae T27	TRUE
1296	Paenibacillus sp 32OW	TRUE
1297	Paenibacillus sp FSL H70357	TRUE
1298	Paenibacillus sp FSL H70737	TRUE
1299	Paenibacillus sp FSL P40081	TRUE
1300	Paenibacillus sp FSL R50345	TRUE
1301	Paenibacillus sp FSL R50912	TRUE
1302	Paenibacillus sp FSL R70273	TRUE
1303	Paenibacillus sp FSL R70331	TRUE
1304	Paenibacillus sp IHB B 3084	TRUE
1305	Paenibacillus sp IHBB 10380	TRUE
1306	Paenibacillus sp JDR2	TRUE
1307	Paenibacillus sp LPB0068	TRUE
1308	Paenibacillus sp Y412MC10	TRUE
1309	Paenibacillus stellifer	TRUE
1310	Paenibacillus swuensis	TRUE
1311	Paenibacillus terrae HPL003	TRUE
1312	Paenibacillus xylanexedens	TRUE
1313	Paenibacillus yonginensis	TRUE
1314	Parageobacillus thermoglucosidans	NA
1315	Parageobacillus thermoglucosidasius C56YS93	NA
1316	Parvimonas micra	FALSE
1317	Pediococcus acidilactici	FALSE
1318	Pediococcus claussenii	FALSE
1319	Pediococcus claussenii ATCC BAA344	FALSE
1320	Pediococcus damnosus	FALSE
1321	Pediococcus pentosaceus	FALSE
1322	Pediococcus pentosaceus ATCC 25745	FALSE
1323	Pediococcus pentosaceus SL4	FALSE
1324	Pelosinus fermentans JBW45	FALSE
1325	Pelosinus sp UFO1	FALSE
1326	Pelotomaculum thermopropionicum SI	NA
1327	Peptoclostridium acidaminophilum DSM 3953	FALSE
1328	Peptoniphilus sp ING2D1G	FALSE
1329	Planococcus antarcticus DSM 14505	FALSE
1330	Planococcus donghaensis	FALSE
1331	Planococcus faecalis	FALSE
1332	Planococcus halocryophilus	FALSE
1333	Planococcus kocurii	FALSE
1334	Planococcus maritimus	FALSE
1335	Planococcus plakortidis	FALSE
1336	Planococcus rifietoensis	FALSE
1337	Planococcus sp L1015	FALSE
1338	Planococcus sp PAMC 21323	FALSE
1339	Roseburia hominis A2183	FALSE
1340	Ruminiclostridium sp KB18	FALSE
1341	Ruminiclostridium thermocellum AD2	FALSE
1342	Ruminiclostridium thermocellum ATCC 27405	FALSE
1343	Ruminiclostridium thermocellum DSM 1313	FALSE
1344	Ruminiclostridium thermocellum DSM 2360	FALSE
1345	Ruminococcaceae bacterium CPB6	NA
1346	Ruminococcus albus 7 DSM 20455	FALSE
1347	Ruminococcus bicirculans	FALSE
1348	Rummeliibacillus stabekisii	FALSE
1349	Salimicrobium jeotgali	FALSE
1350	Salinicoccus halodurans	NA
1351	Selenomonas ruminantium subsp lactilytica TAM6421	FALSE
1352	Selenomonas sp oral taxon 136	FALSE
1353	Selenomonas sp oral taxon 478	FALSE
1354	Selenomonas sp oral taxon 920	FALSE
1355	Selenomonas sputigena ATCC 35185	FALSE
1356	Solibacillus silvestris	FALSE
1357	Solibacillus silvestris StLB046	FALSE
1358	Sporosarcina psychrophila	FALSE
1359	Sporosarcina sp P33	FALSE
1360	Sporosarcina sp P37	FALSE
1361	Sporosarcina ureae	FALSE
1362	Staphylococcaceae bacterium S31	FALSE
1363	Staphylococcus agnetis	FALSE
1364	Staphylococcus argenteus	FALSE
1365	Staphylococcus aureus	FALSE
1366	Staphylococcus aureus 0402981	FALSE
1367	Staphylococcus aureus 08BA02176	FALSE
1368	Staphylococcus aureus Bmb9393	FALSE
1369	Staphylococcus aureus CA347	FALSE
1370	Staphylococcus aureus RF122	FALSE
1371	Staphylococcus aureus subsp aureus	FALSE
1372	Staphylococcus aureus subsp aureus 1181997	FALSE
1373	Staphylococcus aureus subsp aureus 552053	FALSE
1374	Staphylococcus aureus subsp aureus 6850	FALSE
1375	Staphylococcus aureus subsp aureus CN1	FALSE
1376	Staphylococcus aureus subsp aureus COL	FALSE
1377	Staphylococcus aureus subsp aureus DSM 20231	FALSE
1378	Staphylococcus aureus subsp aureus ECTR 2	FALSE
1379	Staphylococcus aureus subsp aureus ED133	FALSE
1380	Staphylococcus aureus subsp aureus ED98	FALSE
1381	Staphylococcus aureus subsp aureus HO 5096 0412	FALSE
1382	Staphylococcus aureus subsp aureus JH1	FALSE
1383	Staphylococcus aureus subsp aureus JH9	FALSE
1384	Staphylococcus aureus subsp aureus JKD6159	FALSE
1385	Staphylococcus aureus subsp aureus LGA251	FALSE
1386	Staphylococcus aureus subsp aureus M013	FALSE
1387	Staphylococcus aureus subsp aureus MRSA252	FALSE
1388	Staphylococcus aureus subsp aureus MSSA476	FALSE
1389	Staphylococcus aureus subsp aureus Mu3	FALSE
1390	Staphylococcus aureus subsp aureus Mu50	FALSE
1391	Staphylococcus aureus subsp aureus MW2	FALSE
1392	Staphylococcus aureus subsp aureus N315	FALSE
1393	Staphylococcus aureus subsp aureus NCTC 8325	FALSE
1394	Staphylococcus aureus subsp aureus SA268	FALSE
1395	Staphylococcus aureus subsp aureus SA40	FALSE
1396	Staphylococcus aureus subsp aureus SA957	FALSE
1397	Staphylococcus aureus subsp aureus ST228	FALSE
1398	Staphylococcus aureus subsp aureus ST398	FALSE
1399	Staphylococcus aureus subsp aureus ST772MRSAV	FALSE
1400	Staphylococcus aureus subsp aureus str JKD6008	FALSE
1401	Staphylococcus aureus subsp aureus str Newman	FALSE
1402	Staphylococcus aureus subsp aureus T0131	FALSE
1403	Staphylococcus aureus subsp aureus Tager 104	FALSE
1404	Staphylococcus aureus subsp aureus TCH60	FALSE
1405	Staphylococcus aureus subsp aureus TW20	FALSE
1406	Staphylococcus aureus subsp aureus USA300_FPR3757	FALSE
1407	Staphylococcus aureus subsp aureus USA300_TCH1516	FALSE
1408	Staphylococcus aureus subsp aureus VC40	FALSE
1409	Staphylococcus aureus subsp aureus Z172	FALSE
1410	Staphylococcus aureus USA300ISMMS1	FALSE
1411	Staphylococcus capitis subsp capitis	FALSE
1412	Staphylococcus carnosus	FALSE
1413	Staphylococcus carnosus subsp carnosus TM300	FALSE
1414	Staphylococcus cohnii	FALSE
1415	Staphylococcus condimenti	FALSE
1416	Staphylococcus epidermidis	FALSE
1417	Staphylococcus epidermidis ATCC 12228	FALSE
1418	Staphylococcus epidermidis PM221	FALSE
1419	Staphylococcus epidermidis RP62A	FALSE
1420	Staphylococcus equorum	FALSE
1421	Staphylococcus haemolyticus	FALSE
1422	Staphylococcus haemolyticus JCSC1435	FALSE
1423	Staphylococcus hyicus	FALSE
1424	Staphylococcus lugdunensis	FALSE
1425	Staphylococcus lugdunensis HKU0901	FALSE
1426	Staphylococcus lugdunensis N920143	FALSE
1427	Staphylococcus lutrae	FALSE
1428	Staphylococcus muscae	FALSE
1429	Staphylococcus pasteuri SP1	FALSE
1430	Staphylococcus pettenkoferi	FALSE
1431	Staphylococcus piscifermentans	FALSE
1432	Staphylococcus pseudintermedius	FALSE
1433	Staphylococcus pseudintermedius ED99	FALSE
1434	Staphylococcus pseudintermedius HKU1003	FALSE
1435	Staphylococcus saprophyticus	FALSE
1436	Staphylococcus saprophyticus subsp saprophyticus ATCC 15305	FALSE
1437	Staphylococcus schleiferi	FALSE
1438	Staphylococcus sciuri	FALSE
1439	Staphylococcus simiae	FALSE
1440	Staphylococcus simulans	FALSE
1441	Staphylococcus sp AntiMn1	FALSE
1442	Staphylococcus stepanovicii	FALSE
1443	Staphylococcus warneri SG1	FALSE
1444	Staphylococcus xylosus	FALSE
1445	Streptococcus acidominimus	FALSE
1446	Streptococcus agalactiae	FALSE
1447	Streptococcus agalactiae 09mas018883	FALSE
1448	Streptococcus agalactiae 138P	FALSE
1449	Streptococcus agalactiae 222	FALSE
1450	Streptococcus agalactiae 2603VR	FALSE
1451	Streptococcus agalactiae A909	FALSE
1452	Streptococcus agalactiae CNCTC 1084	FALSE
1453	Streptococcus agalactiae COH1	FALSE
1454	Streptococcus agalactiae GD201008001	FALSE
1455	Streptococcus agalactiae ILRI005	FALSE
1456	Streptococcus agalactiae ILRI112	FALSE
1457	Streptococcus agalactiae NEM316	FALSE
1458	Streptococcus anginosus	FALSE
1459	Streptococcus anginosus C1051	FALSE
1460	Streptococcus anginosus C238	FALSE
1461	Streptococcus anginosus subsp whileyi MAS624	FALSE
1462	Streptococcus constellatus subsp pharyngis C1050	FALSE
1463	Streptococcus constellatus subsp pharyngis C232	FALSE
1464	Streptococcus constellatus subsp pharyngis C818	FALSE
1465	Streptococcus cristatus AS 13089	FALSE
1466	Streptococcus dysgalactiae subsp equisimilis 167	FALSE
1467	Streptococcus dysgalactiae subsp equisimilis AC2713	FALSE
1468	Streptococcus dysgalactiae subsp equisimilis ATCC 12394	FALSE
1469	Streptococcus dysgalactiae subsp equisimilis GGS_124	FALSE
1470	Streptococcus dysgalactiae subsp equisimilis RE378	FALSE
1471	Streptococcus equi subsp equi	FALSE
1472	Streptococcus equi subsp equi 4047	FALSE
1473	Streptococcus equi subsp zooepidemicus	FALSE
1474	Streptococcus equi subsp zooepidemicus ATCC 35246	FALSE
1475	Streptococcus equi subsp zooepidemicus CY	FALSE
1476	Streptococcus equi subsp zooepidemicus MGCS10565	FALSE
1477	Streptococcus equinus	FALSE
1478	Streptococcus gallolyticus	FALSE
1479	Streptococcus gallolyticus subsp gallolyticus ATCC 43143	FALSE
1480	Streptococcus gallolyticus subsp gallolyticus ATCC BAA2069	FALSE
1481	Streptococcus gallolyticus subsp gallolyticus DSM 16831	FALSE
1482	Streptococcus gallolyticus UCN34	FALSE
1483	Streptococcus gordonii	FALSE
1484	Streptococcus gordonii str Challis substr CH1	FALSE
1485	Streptococcus infantarius	FALSE
1486	Streptococcus infantarius subsp infantarius CJ18	FALSE
1487	Streptococcus iniae	FALSE
1488	Streptococcus iniae SF1	FALSE
1489	Streptococcus intermedius	FALSE
1490	Streptococcus intermedius B196	FALSE
1491	Streptococcus intermedius C270	FALSE
1492	Streptococcus intermedius JTH08	FALSE
1493	Streptococcus lutetiensis 033	FALSE
1494	Streptococcus macedonicus ACADC 198	FALSE
1495	Streptococcus merionis	FALSE
1496	Streptococcus mitis	FALSE
1497	Streptococcus mitis B6	FALSE
1498	Streptococcus mutans	FALSE
1499	Streptococcus mutans GS5	FALSE
1500	Streptococcus mutans LJ23	FALSE
1501	Streptococcus mutans NN2025	FALSE
1502	Streptococcus mutans UA159	FALSE
1503	Streptococcus mutans UA159FR	FALSE
1504	Streptococcus oralis	FALSE
1505	Streptococcus oralis Uo5	FALSE
1506	Streptococcus pantholopis	FALSE
1507	Streptococcus parasanguinis ATCC 15912	FALSE
1508	Streptococcus parasanguinis FW213	FALSE
1509	Streptococcus parauberis KCTC 11537	FALSE
1510	Streptococcus pasteurianus ATCC 43144	FALSE
1511	Streptococcus pneumoniae	FALSE
1512	Streptococcus pneumoniae 6706B	FALSE
1513	Streptococcus pneumoniae 70585	FALSE
1514	Streptococcus pneumoniae AP200	FALSE
1515	Streptococcus pneumoniae ATCC 700669	FALSE
1516	Streptococcus pneumoniae CGSP14	FALSE
1517	Streptococcus pneumoniae D39	FALSE
1518	Streptococcus pneumoniae G54	FALSE
1519	Streptococcus pneumoniae gamPNI0373	FALSE
1520	Streptococcus pneumoniae Hungary19A6	FALSE
1521	Streptococcus pneumoniae INV104	FALSE
1522	Streptococcus pneumoniae INV200	FALSE
1523	Streptococcus pneumoniae JJA	FALSE
1524	Streptococcus pneumoniae OXC141	FALSE
1525	Streptococcus pneumoniae P1031	FALSE
1526	Streptococcus pneumoniae R6	FALSE
1527	Streptococcus pneumoniae SPN034156	FALSE
1528	Streptococcus pneumoniae SPN034183	FALSE
1529	Streptococcus pneumoniae SPN994038	FALSE
1530	Streptococcus pneumoniae SPN994039	FALSE
1531	Streptococcus pneumoniae SPNA45	FALSE
1532	Streptococcus pneumoniae ST556	FALSE
1533	Streptococcus pneumoniae Taiwan19F14	FALSE
1534	Streptococcus pneumoniae TCH843119A	FALSE
1535	Streptococcus pneumoniae TIGR4	FALSE
1536	Streptococcus pseudopneumoniae IS7493	FALSE
1537	Streptococcus pyogenes	FALSE
1538	Streptococcus pyogenes A20	FALSE
1539	Streptococcus pyogenes Alab49	FALSE
1540	Streptococcus pyogenes HSC5	FALSE
1541	Streptococcus pyogenes JRS4	FALSE
1542	Streptococcus pyogenes M1 476	FALSE
1543	Streptococcus pyogenes M1 GAS	FALSE
1544	Streptococcus pyogenes MGAS10270	FALSE
1545	Streptococcus pyogenes MGAS10394	FALSE
1546	Streptococcus pyogenes MGAS10750	FALSE
1547	Streptococcus pyogenes MGAS15252	FALSE
1548	Streptococcus pyogenes MGAS1882	FALSE
1549	Streptococcus pyogenes MGAS2096	FALSE
1550	Streptococcus pyogenes MGAS315	FALSE
1551	Streptococcus pyogenes MGAS5005	FALSE
1552	Streptococcus pyogenes MGAS6180	FALSE
1553	Streptococcus pyogenes MGAS8232	FALSE
1554	Streptococcus pyogenes MGAS9429	FALSE
1555	Streptococcus pyogenes NZ131	FALSE
1556	Streptococcus pyogenes SSI1	FALSE
1557	Streptococcus pyogenes STAB901	FALSE
1558	Streptococcus pyogenes STAB902	FALSE
1559	Streptococcus pyogenes str Manfredo	FALSE
1560	Streptococcus salivarius	FALSE
1561	Streptococcus salivarius 57I	FALSE
1562	Streptococcus salivarius CCHSS3	FALSE
1563	Streptococcus salivarius JIM8777	FALSE
1564	Streptococcus sanguinis SK36	FALSE
1565	Streptococcus sp A12	FALSE
1566	Streptococcus sp FDAARGOS_192	FALSE
1567	Streptococcus sp group B	FALSE
1568	Streptococcus sp IG2	FALSE
1569	Streptococcus sp IP16	FALSE
1570	Streptococcus sp oral taxon 431	FALSE
1571	Streptococcus sp VT 162	FALSE
1572	Streptococcus suis	FALSE
1573	Streptococcus suis 05HAS68	FALSE
1574	Streptococcus suis 05ZYH33	FALSE
1575	Streptococcus suis 6407	FALSE
1576	Streptococcus suis 98HAH33	FALSE
1577	Streptococcus suis A7	FALSE
1578	Streptococcus suis BM407	FALSE
1579	Streptococcus suis D12	FALSE
1580	Streptococcus suis D9	FALSE
1581	Streptococcus suis GZ1	FALSE
1582	Streptococcus suis JS14	FALSE
1583	Streptococcus suis P17	FALSE
1584	Streptococcus suis S735	FALSE
1585	Streptococcus suis SC070731	FALSE
1586	Streptococcus suis SC84	FALSE
1587	Streptococcus suis SS12	FALSE
1588	Streptococcus suis ST1	FALSE
1589	Streptococcus suis ST3	FALSE
1590	Streptococcus suis T15	FALSE
1591	Streptococcus suis TL13	FALSE
1592	Streptococcus suis YB51	FALSE
1593	Streptococcus thermophilus	FALSE
1594	Streptococcus thermophilus ASCC 1275	FALSE
1595	Streptococcus thermophilus CNRZ1066	FALSE
1596	Streptococcus thermophilus JIM 8232	FALSE
1597	Streptococcus thermophilus LMD9	FALSE
1598	Streptococcus thermophilus LMG 18311	FALSE
1599	Streptococcus thermophilus MNZLW002	FALSE
1600	Streptococcus thermophilus ND03	FALSE
1601	Streptococcus uberis 0140J	FALSE
1602	Sulfobacillus acidophilus DSM 10332	FALSE
1603	Sulfobacillus acidophilus TPY	FALSE
1604	Symbiobacterium thermophilum IAM 14863	FALSE
1605	Syntrophobotulus glycolicus DSM 8271	FALSE
1606	Syntrophomonas wolfei subsp wolfei str Goettingen G311	TRUE
1607	Syntrophothermus lipocalidus DSM 12680	NA
1608	Tepidanaerobacter acetatoxydans Re1	FALSE
1609	Terribacillus aidingensis	FALSE
1610	Tetragenococcus halophilus	FALSE
1611	Tetragenococcus halophilus NBRC 12172	FALSE
1612	Thermacetogenium phaeum DSM 12270	FALSE
1613	Thermaerobacter marianensis DSM 12885	FALSE
1614	Thermincola potens JR	NA
1615	Thermoanaerobacter brockii subsp finnii Ako1	FALSE
1616	Thermoanaerobacter italicus Ab9	FALSE
1617	Thermoanaerobacter kivui	FALSE
1618	Thermoanaerobacter mathranii subsp mathranii str A3	FALSE
1619	Thermoanaerobacter pseudethanolicus ATCC 33223	FALSE
1620	Thermoanaerobacter sp X513	FALSE
1621	Thermoanaerobacter sp X514	FALSE
1622	Thermoanaerobacter wiegelii Rt8B1	FALSE
1623	Thermoanaerobacterium saccharolyticum JWSLYS485	FALSE
1624	Thermoanaerobacterium thermosaccharolyticum	FALSE
1625	Thermoanaerobacterium thermosaccharolyticum DSM 571	FALSE
1626	Thermoanaerobacterium thermosaccharolyticum M0795	FALSE
1627	Thermoanaerobacterium xylanolyticum LX11	FALSE
1628	Thermobacillus composti KWC4	FALSE
1629	Thermodesulfobium narugense DSM 14796	FALSE
1630	Thermosediminibacter oceani DSM 16646	FALSE
1631	Tumebacillus algifaecis	NA
1632	Tumebacillus sp AR23208	NA
1633	Turicibacter sp H121	TRUE
1634	Vagococcus penaei	FALSE
1635	Vagococcus teuberi	FALSE
1636	Veillonella atypica	TRUE
1637	Veillonella parvula	TRUE
1638	Veillonella parvula DSM 2008	TRUE
1639	Veillonella rodentium	TRUE
1640	Virgibacillus halodenitrificans	FALSE
1641	Virgibacillus necropolis	FALSE
1642	Virgibacillus sp 6R	FALSE
1643	Virgibacillus sp LM2416	FALSE
1644	Virgibacillus sp SK37	FALSE
1645	Weissella ceti	FALSE
1646	Weissella cibaria	FALSE
1647	Weissella jogaejeotgali	FALSE
1648	Weissella koreensis KACC 15510	FALSE
1649	Acaryochloris marina MBIC11017	TRUE
1650	Anabaena cylindrica PCC 7122	TRUE
1651	Anabaena sp 90	TRUE
1652	Anabaena sp wa102	TRUE
1653	Anabaena variabilis ATCC 29413	TRUE
1654	Calothrix sp 3363	TRUE
1655	Calothrix sp PCC 6303	TRUE
1656	Calothrix sp PCC 7507	TRUE
1657	Candidatus Atelocyanobacterium thalassa isolate ALOHA	FALSE
1658	Candidatus Melainabacteria bacterium MELA1	FALSE
1659	Chroococcidiopsis thermalis PCC 7203	TRUE
1660	Crinalium epipsammum PCC 9333	TRUE
1661	Cyanobacterium aponinum PCC 10605	NA
1662	cyanobacterium endosymbiont of Epithemia turgida isolate EtSB Lake Yunoko	NA
1663	Cyanobacterium stanieri PCC 7202	NA
1664	Cyanobium gracile PCC 6307	TRUE
1665	Cyanobium sp NIES981	TRUE
1666	Cyanothece sp ATCC 51142	TRUE
1667	Cyanothece sp PCC 7424	TRUE
1668	Cyanothece sp PCC 7425	TRUE
1669	Cyanothece sp PCC 7822	TRUE
1670	Cyanothece sp PCC 8801	TRUE
1671	Cyanothece sp PCC 8802	TRUE
1672	Dactylococcopsis salina PCC 8305	TRUE
1673	Fischerella sp NIES3754	TRUE
1674	Geitlerinema sp PCC 7407	TRUE
1675	Geminocystis sp NIES3708	TRUE
1676	Geminocystis sp NIES3709	TRUE
1677	Gloeobacter kilaueensis JS1	TRUE
1678	Gloeobacter violaceus PCC 7421	TRUE
1679	Gloeocapsa sp PCC 7428	TRUE
1680	Halomicronema hongdechloris C2206	TRUE
1681	Halothece sp PCC 7418	FALSE
1682	Leptolyngbya boryana dg5	TRUE
1683	Leptolyngbya boryana IAM M101	TRUE
1684	Leptolyngbya sp NIES3755	TRUE
1685	Leptolyngbya sp O77	TRUE
1686	Leptolyngbya sp PCC 7376	TRUE
1687	Microcoleus sp PCC 7113	TRUE
1688	Microcystis aeruginosa NIES2481	TRUE
1689	Microcystis aeruginosa NIES2549	TRUE
1690	Microcystis aeruginosa NIES843	TRUE
1691	Microcystis aeruginosa PCC 7806SL	TRUE
1692	Microcystis panniformis FACHB1757	TRUE
1693	Moorea producens PAL815081	TRUE
1694	Nostoc azollae 0708	TRUE
1695	Nostoc punctiforme PCC 73102	TRUE
1696	Nostoc sp NIES3756	TRUE
1697	Nostoc sp PCC 7107	TRUE
1698	Nostoc sp PCC 7120	TRUE
1699	Nostoc sp PCC 7524	TRUE
1700	Nostocales cyanobacterium HT582	TRUE
1701	Oscillatoria acuminata PCC 6304	TRUE
1702	Oscillatoria nigroviridis PCC 7112	TRUE
1703	Pleurocapsa sp PCC 7327	TRUE
1704	Prochlorococcus marinus str AS9601	FALSE
1705	Prochlorococcus marinus str MIT 9215	FALSE
1706	Prochlorococcus marinus str MIT 9301	FALSE
1707	Prochlorococcus marinus str MIT 9303	FALSE
1708	Prochlorococcus marinus str MIT 9312	FALSE
1709	Prochlorococcus marinus str MIT 9313	FALSE
1710	Prochlorococcus marinus str MIT 9515	FALSE
1711	Prochlorococcus marinus str NATL1A	FALSE
1712	Prochlorococcus marinus str NATL2A	FALSE
1713	Prochlorococcus marinus subsp marinus str CCMP1375	FALSE
1714	Prochlorococcus marinus subsp pastoris str CCMP1986	FALSE
1715	Prochlorococcus sp MIT 0604	FALSE
1716	Prochlorococcus sp MIT 0801	FALSE
1717	Pseudanabaena sp PCC 7367	TRUE
1718	Rivularia sp PCC 7116	TRUE
1719	Stanieria cyanosphaera PCC 7437	TRUE
1720	Synechococcus elongatus PCC 6301	FALSE
1721	Synechococcus elongatus PCC 7942	FALSE
1722	Synechococcus sp CC9311	FALSE
1723	Synechococcus sp CC9605	FALSE
1724	Synechococcus sp CC9902	FALSE
1725	Synechococcus sp JA23Ba213	FALSE
1726	Synechococcus sp JA33Ab	FALSE
1727	Synechococcus sp KORDI100	FALSE
1728	Synechococcus sp KORDI49	FALSE
1729	Synechococcus sp KORDI52	FALSE
1730	Synechococcus sp PCC 6312	FALSE
1731	Synechococcus sp PCC 7002	FALSE
1732	Synechococcus sp PCC 7003	FALSE
1733	Synechococcus sp PCC 7117	FALSE
1734	Synechococcus sp PCC 73109	FALSE
1735	Synechococcus sp PCC 7502	FALSE
1736	Synechococcus sp PCC 8807	FALSE
1737	Synechococcus sp RCC307	FALSE
1738	Synechococcus sp SynAce01	FALSE
1739	Synechococcus sp UTEX 2973	FALSE
1740	Synechococcus sp WH 7803	FALSE
1741	Synechococcus sp WH 8102	FALSE
1742	Synechococcus sp WH 8103	FALSE
1743	Synechococcus sp WH 8109	FALSE
1744	Synechocystis sp PCC 6714	FALSE
1745	Synechocystis sp PCC 6803	FALSE
1746	Synechocystis sp PCC 6803 substr GTI	FALSE
1747	Synechocystis sp PCC 6803 substr PCCN	FALSE
1748	Synechocystis sp PCC 6803 substr PCCP	FALSE
1749	Thermosynechococcus elongatus BP1	FALSE
1750	Trichodesmium erythraeum IMS101	TRUE
1751	Anaerolinea thermophila UNI1	TRUE
1752	Brevefilum fermentans	TRUE
1753	Anaerolineaceae bacterium oral taxon 439	TRUE
1754	Candidatus Promineofilum breve	TRUE
1755	Caldilinea aerophila DSM 14535 NBRC 104270	TRUE
1756	Chloroflexus sp Y400fl	TRUE
1757	Chloroflexus aggregans DSM 9485	TRUE
1758	Chloroflexus aurantiacus J10fl	TRUE
1759	Roseiflexus sp RS1	TRUE
1760	Roseiflexus castenholzii DSM 13941	TRUE
1761	Herpetosiphon aurantiacus DSM 785	TRUE
1762	Dehalococcoides sp UCH007	FALSE
1763	Dehalococcoides mccartyi	FALSE
1764	Dehalococcoides mccartyi CBDB1	FALSE
1765	Dehalococcoides mccartyi 195	FALSE
1766	Dehalococcoides mccartyi BAV1	FALSE
1767	Dehalococcoides mccartyi VS	FALSE
1768	Dehalococcoides mccartyi GT	FALSE
1769	Dehalococcoides mccartyi DCMB5	FALSE
1770	Dehalococcoides mccartyi BTF08	FALSE
1771	Dehalococcoides mccartyi GY50	FALSE
1772	Dehalococcoides mccartyi CG5	FALSE
1773	Dehalococcoides mccartyi CG4	FALSE
1774	Dehalococcoides mccartyi CG1	FALSE
1775	Dehalococcoides mccartyi IBARAKI	FALSE
1776	Dehalogenimonas sp WBC2	FALSE
1777	Dehalogenimonas formicexedens	FALSE
1778	Dehalogenimonas lykanthroporepellens BLDC9	FALSE
1779	Sphaerobacter thermophilus DSM 20745	FALSE
1780	Thermomicrobium roseum DSM 5159	FALSE
1781	Acidithiobacillus caldus ATCC 51756	FALSE
1782	Acidithiobacillus caldus SM1	FALSE
1783	Acidithiobacillus ferrivorans SS3	FALSE
1784	Acidithiobacillus ferrooxidans ATCC 53993	FALSE
1785	Acidithiobacillus ferrooxidans ATCC 23270	FALSE
1786	Asticcacaulis excentricus CB 48	FALSE
1787	Brevundimonas naejangsanensis	FALSE
1788	Brevundimonas sp DS20	FALSE
1789	Brevundimonas sp GW460121014LB2	FALSE
1790	Brevundimonas sp LM2	FALSE
1791	Brevundimonas vesicularis	FALSE
1792	Brevundimonas subvibrioides ATCC 15264	FALSE
1793	Caulobacter sp K31	FALSE
1794	Caulobacter henricii	FALSE
1795	Caulobacter vibrioides	FALSE
1796	Caulobacter segnis ATCC 21756	FALSE
1797	Caulobacter crescentus CB15	FALSE
1798	Caulobacter crescentus NA1000	FALSE
1799	Phenylobacterium zucineum HLK1	FALSE
1800	Caulobacteraceae bacterium OTSz_A_272	FALSE
1801	Candidatus Paracaedibacter acanthamoebae	FALSE
1802	endosymbiont of Acanthamoeba sp UWC8	FALSE
1803	Candidatus Caedibacter acanthamoebae	FALSE
1804	Candidatus Nucleicultrix amoebiphila FS5	FALSE
1805	Magnetococcus marinus MC1	FALSE
1806	Parvularcula bermudensis HTCC2503	FALSE
1807	Candidatus Pelagibacter sp IMCC9063	FALSE
1808	Candidatus Pelagibacter ubique HTCC1062	FALSE
1809	alpha proteobacterium HIMB5	FALSE
1810	alpha proteobacterium HIMB59	FALSE
1811	Aureimonas sp AU20	FALSE
1812	Martelella endophytica	FALSE
1813	Martelella sp AD3	FALSE
1814	Martelella mediterranea DSM 17316	FALSE
1815	Bartonella henselae	FALSE
1816	Bartonella tribocorum	FALSE
1817	Bartonella ancashensis	FALSE
1818	Bartonella bacilliformis	FALSE
1819	Bartonella apis	FALSE
1820	Bartonella sp A1379B	FALSE
1821	Bartonella sp WD162	FALSE
1822	Bartonella sp Raccoon60	FALSE
1823	Bartonella sp JB15	FALSE
1824	Bartonella sp JB63	FALSE
1825	Bartonella australis AustNH1	FALSE
1826	Bartonella bacilliformis KC583	FALSE
1827	Bartonella clarridgeiae 73	FALSE
1828	Bartonella grahamii as4aup	FALSE
1829	Bartonella henselae str Houston1	FALSE
1830	Bartonella quintana str Toulouse	FALSE
1831	Bartonella quintana RM11	FALSE
1832	Bartonella tribocorum CIP 105476	FALSE
1833	Bartonella vinsonii subsp berkhoffii str Winnie	FALSE
1834	Beijerinckia indica subsp indica ATCC 9039	FALSE
1835	Chelatococcus sp CO6	FALSE
1836	Chelatococcus daeguensis	FALSE
1837	Methylocella silvestris BL2	FALSE
1838	Bosea sp PAMC 26642	TRUE
1839	Bosea sp RAC05	TRUE
1840	Bosea vaviloviae	TRUE
1841	Bradyrhizobium sp BTAi1	TRUE
1842	Bradyrhizobium sp ORS 278	TRUE
1843	Bradyrhizobium sp S23321	TRUE
1844	Bradyrhizobium sp CCGELA001	TRUE
1845	Bradyrhizobium japonicum	TRUE
1846	Bradyrhizobium diazoefficiens	TRUE
1847	Bradyrhizobium icense	TRUE
1848	Bradyrhizobium sp	TRUE
1849	Bradyrhizobium sp ORS 285	TRUE
1850	Bradyrhizobium diazoefficiens USDA 110	TRUE
1851	Bradyrhizobium japonicum USDA 6	TRUE
1852	Bradyrhizobium oligotrophicum S58	TRUE
1853	Nitrobacter hamburgensis X14	FALSE
1854	Nitrobacter winogradskyi Nb255	FALSE
1855	Oligotropha carboxidovorans OM5	FALSE
1856	Oligotropha carboxidovorans OM4	FALSE
1857	Rhodopseudomonas palustris HaA2	FALSE
1858	Rhodopseudomonas palustris BisB5	FALSE
1859	Rhodopseudomonas palustris BisB18	FALSE
1860	Rhodopseudomonas palustris BisA53	FALSE
1861	Rhodopseudomonas palustris TIE1	FALSE
1862	Rhodopseudomonas palustris DX1	FALSE
1863	Rhodopseudomonas palustris CGA009	FALSE
1864	Brucella canis	FALSE
1865	Brucella abortus	FALSE
1866	Brucella suis	FALSE
1867	Brucella pinnipedialis	FALSE
1868	Brucella melitensis	FALSE
1869	Brucella sp 2002734562	FALSE
1870	Brucella sp 09RB8471	FALSE
1871	Brucella sp 09RB8910	FALSE
1872	Brucella vulpis	FALSE
1873	Brucella sp 141012304	FALSE
1874	Brucella abortus S19	FALSE
1875	Brucella abortus 2308	FALSE
1876	Brucella abortus A13334	FALSE
1877	Brucella abortus 104M	FALSE
1878	Brucella abortus bv 1 str 9941	FALSE
1879	Brucella abortus bv 2 str 86859	FALSE
1880	Brucella abortus bv 6 str 870	FALSE
1881	Brucella abortus bv 9 str C68	FALSE
1882	Brucella canis ATCC 23365	FALSE
1883	Brucella canis HSK A52141	FALSE
1884	Brucella ceti TE1075912	FALSE
1885	Brucella ceti TE2875312	FALSE
1886	Brucella melitensis M28	FALSE
1887	Brucella melitensis NI	FALSE
1888	Brucella melitensis bv 1 str 16M	FALSE
1889	Brucella melitensis ATCC 23457	FALSE
1890	Brucella melitensis bv 3 str Ether	FALSE
1891	Brucella melitensis M590	FALSE
1892	Brucella microti CCM 4915	FALSE
1893	Brucella ovis ATCC 25840	FALSE
1894	Brucella pinnipedialis B294	FALSE
1895	Brucella suis 1330	FALSE
1896	Brucella suis VBI22	FALSE
1897	Brucella suis bv 2	FALSE
1898	Brucella suis bv 1 str S2	FALSE
1899	Brucella suis ATCC 23445	FALSE
1900	Brucella suis bv 3 str 686	FALSE
1901	Ochrobactrum anthropi	FALSE
1902	Ochrobactrum pseudogrignonense	FALSE
1903	Ochrobactrum sp A44	FALSE
1904	Ochrobactrum anthropi ATCC 49188	FALSE
1905	Blastochloris viridis	FALSE
1906	Devosia sp H5989	FALSE
1907	Candidatus Filomicrobium marinum	FALSE
1908	Hyphomicrobium sp MC1	FALSE
1909	Hyphomicrobium denitrificans ATCC 51888	FALSE
1910	Hyphomicrobium denitrificans 1NES1	FALSE
1911	Hyphomicrobium nitrativorans NL23	FALSE
1912	Pelagibacterium halotolerans B2	FALSE
1913	Rhodomicrobium vannielii ATCC 17100	FALSE
1914	Rhodoplanes sp Z2YC6860	FALSE
1915	Methylobacterium sp 446	TRUE
1916	Methylobacterium sp AMS5	TRUE
1917	Methylobacterium aquaticum	TRUE
1918	Methylobacterium phyllosphaerae	TRUE
1919	Methylobacterium zatmanii	TRUE
1920	Methylobacterium extorquens	TRUE
1921	Methylobacterium extorquens PA1	TRUE
1922	Methylobacterium extorquens CM4	TRUE
1923	Methylobacterium extorquens AM1	TRUE
1924	Methylobacterium extorquens DM4	TRUE
1925	Methylobacterium nodulans ORS 2060	TRUE
1926	Methylobacterium oryzae CBMB20	TRUE
1927	Methylobacterium populi BJ001	TRUE
1928	Methylobacterium radiotolerans JCM 2831	TRUE
1929	Methylocystis sp SC2	FALSE
1930	Methylocystis bryophila	FALSE
1931	Aminobacter aminovorans	FALSE
1932	Chelativorans sp BNC1	FALSE
1933	Hoeflea sp IMCC20628	FALSE
1934	Mesorhizobium ciceri	TRUE
1935	Mesorhizobium sp WSM1497	TRUE
1936	Mesorhizobium sp B7	TRUE
1937	Mesorhizobium amorphae CCNWGS0123	TRUE
1938	Mesorhizobium australicum WSM2073	TRUE
1939	Mesorhizobium ciceri biovar biserrulae	TRUE
1940	Mesorhizobium ciceri biovar biserrulae WSM1271	TRUE
1941	Mesorhizobium loti MAFF303099	TRUE
1942	Mesorhizobium loti NZP2037	TRUE
1943	Mesorhizobium opportunistum WSM2075	TRUE
1944	Candidatus Liberibacter asiaticus	FALSE
1945	Liberibacter crescens	FALSE
1946	Candidatus Liberibacter africanus PTSAPSY	FALSE
1947	Candidatus Liberibacter americanus str Sao Paulo	FALSE
1948	Candidatus Liberibacter asiaticus str psy62	FALSE
1949	Candidatus Liberibacter asiaticus str gxpsy	FALSE
1950	Candidatus Liberibacter asiaticus str Ishi1	FALSE
1951	Candidatus Liberibacter solanacearum CLsoZC1	FALSE
1952	Liberibacter crescens BT1	FALSE
1953	Agrobacterium sp H133	FALSE
1954	Agrobacterium sp RAC06	FALSE
1955	Agrobacterium rhizogenes	FALSE
1956	Agrobacterium tumefaciens	FALSE
1957	Agrobacterium fabrum str C58	FALSE
1958	Agrobacterium radiobacter K84	FALSE
1959	Agrobacterium vitis S4	FALSE
1960	Neorhizobium galegae bv officinalis bv officinalis str HAMBI 1141	FALSE
1961	Neorhizobium galegae bv orientalis str HAMBI 540	FALSE
1962	Rhizobium sp Kim5	TRUE
1963	Rhizobium sp CIAT894	TRUE
1964	Rhizobium sp IRBG74	TRUE
1965	Rhizobium sp IE4771	TRUE
1966	Rhizobium sp NT26	TRUE
1967	Rhizobium sp N1341	TRUE
1968	Rhizobium phaseoli	TRUE
1969	Rhizobium sp N731	TRUE
1970	Rhizobium etli	TRUE
1971	Rhizobium sp N1314	TRUE
1972	Rhizobium sp N621	TRUE
1973	Rhizobium sp N113	TRUE
1974	Rhizobium sp N6212	TRUE
1975	Rhizobium sp N324	TRUE
1976	Rhizobium sp N871	TRUE
1977	Rhizobium sp N741	TRUE
1978	Rhizobium leguminosarum	TRUE
1979	Rhizobium sp S41	TRUE
1980	Rhizobium gallicum	TRUE
1981	Rhizobium sp NXC14	TRUE
1982	Rhizobium sp TAL182	TRUE
1983	Rhizobium sp 10195	TRUE
1984	Rhizobium etli CIAT 652	TRUE
1985	Rhizobium etli CFN 42	TRUE
1986	Rhizobium etli Brasil 5	TRUE
1987	Rhizobium etli 8C3	TRUE
1988	Rhizobium etli bv mimosae str Mim1	TRUE
1989	Rhizobium etli bv phaseoli str IE4803	TRUE
1990	Rhizobium gallicum bv gallicum R602	TRUE
1991	Rhizobium leguminosarum bv viciae	TRUE
1992	Rhizobium leguminosarum bv trifolii WSM2304	TRUE
1993	Rhizobium leguminosarum bv trifolii WSM1325	TRUE
1994	Rhizobium leguminosarum bv trifolii WSM1689	TRUE
1995	Rhizobium leguminosarum bv trifolii CB782	TRUE
1996	Rhizobium leguminosarum bv viciae 3841	TRUE
1997	Rhizobium tropici CIAT 899	TRUE
1998	Shinella sp HZN7	FALSE
1999	Ensifer adhaerens	TRUE
[truncated: 4,957 more rows]
