# Supplementary figures and images for: Highly regulated, diversifying NTP-dependent biological conflict systems with implications for the emergence of multicellularity
Source: eLife journal article supplement (doi:10.7554/elife.52696), 2020-02-26

Figure 1 - Figure supplement 1

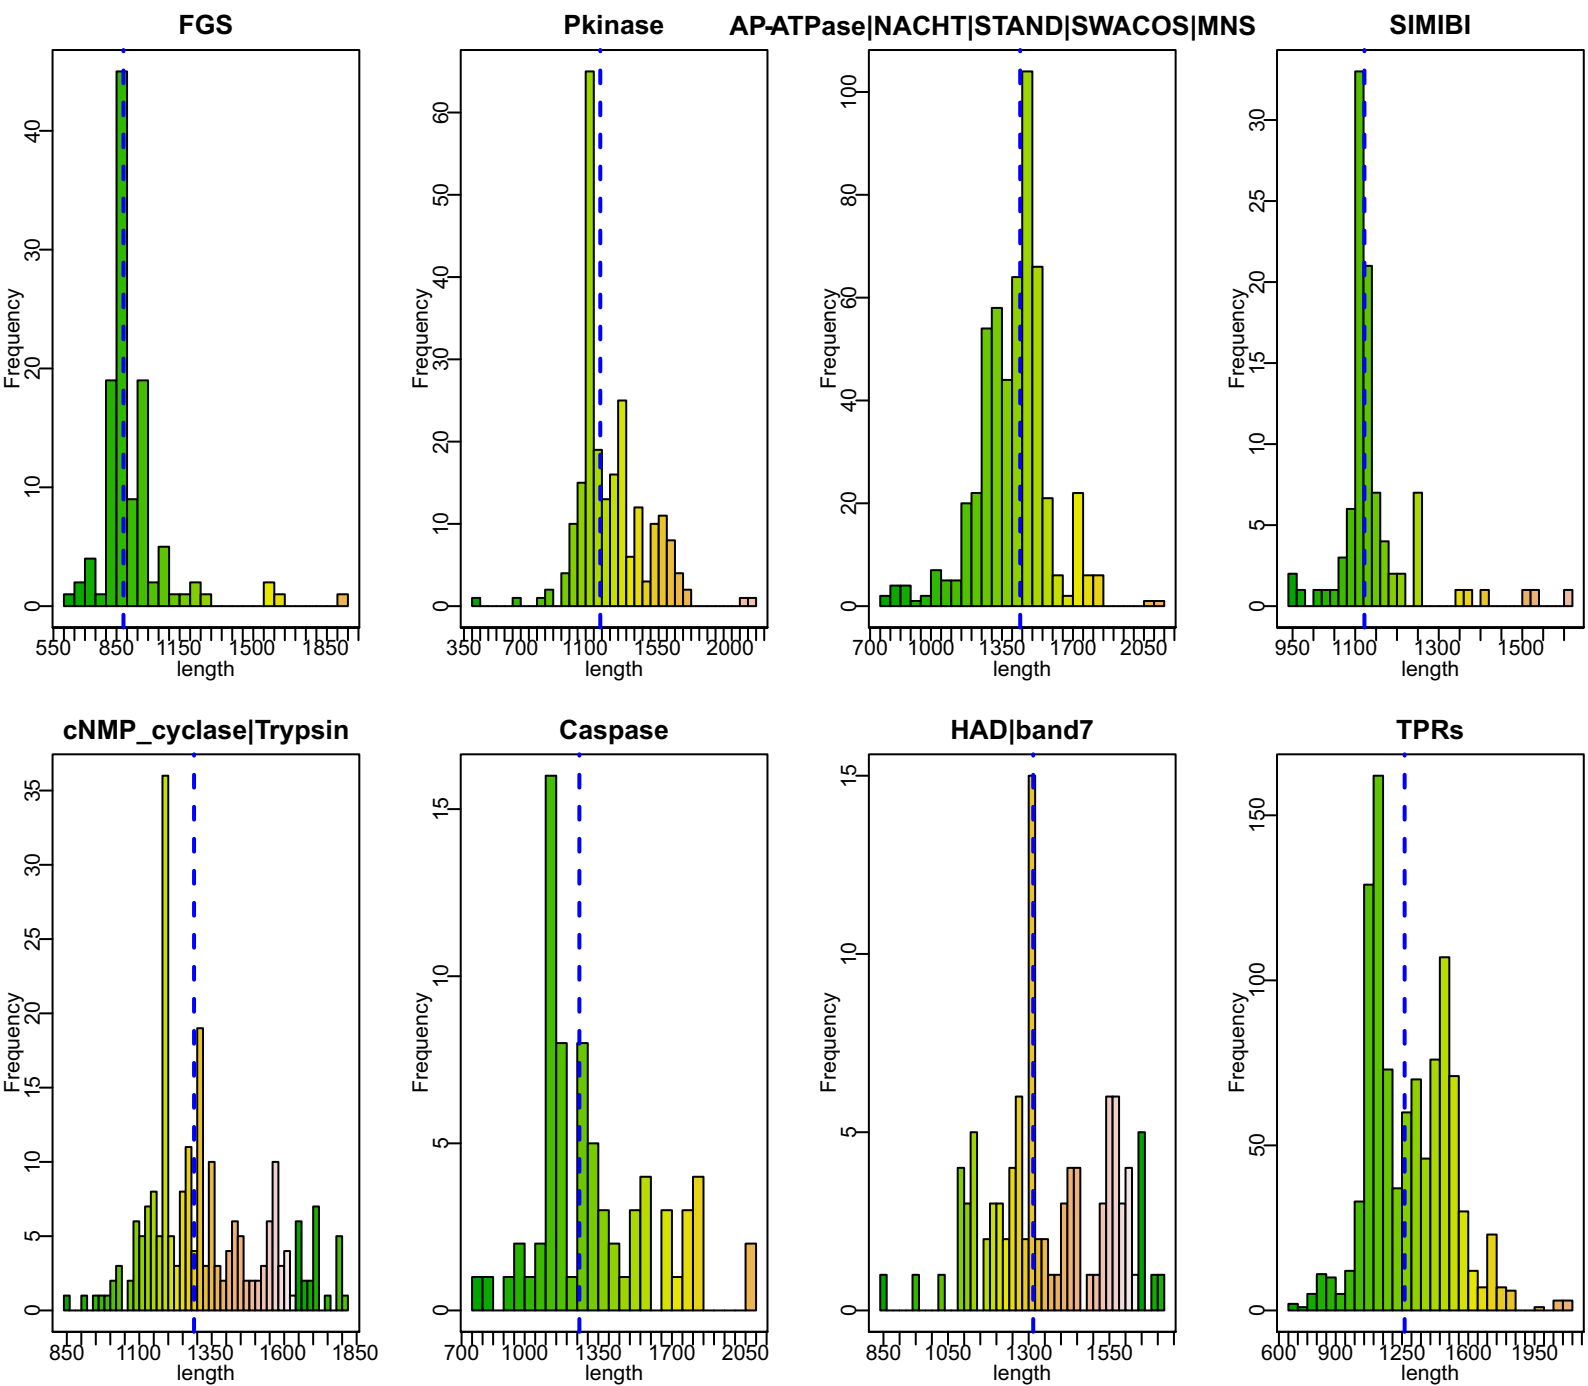

Supplement: supp [file elife-52696-supp-v1.zip]

Figure 1 - Figure supplement 2

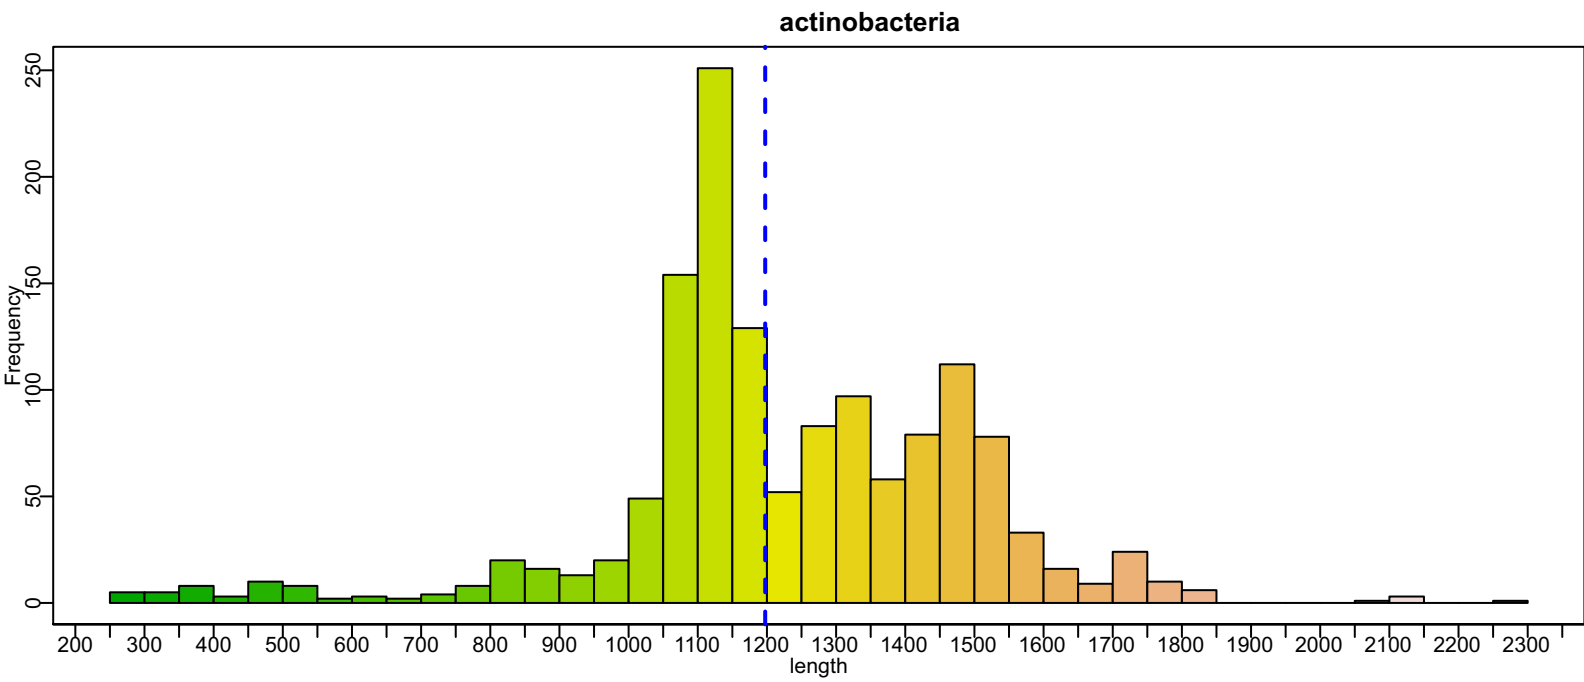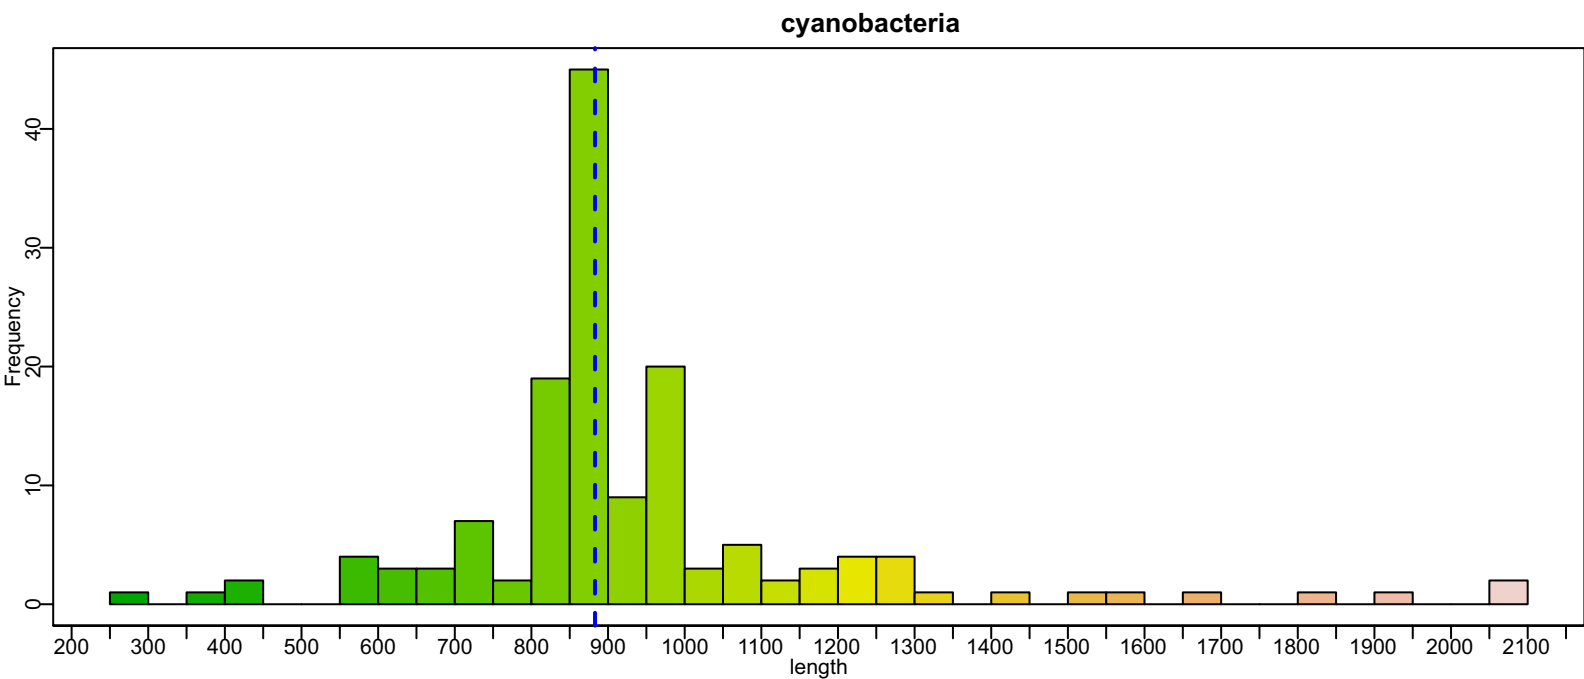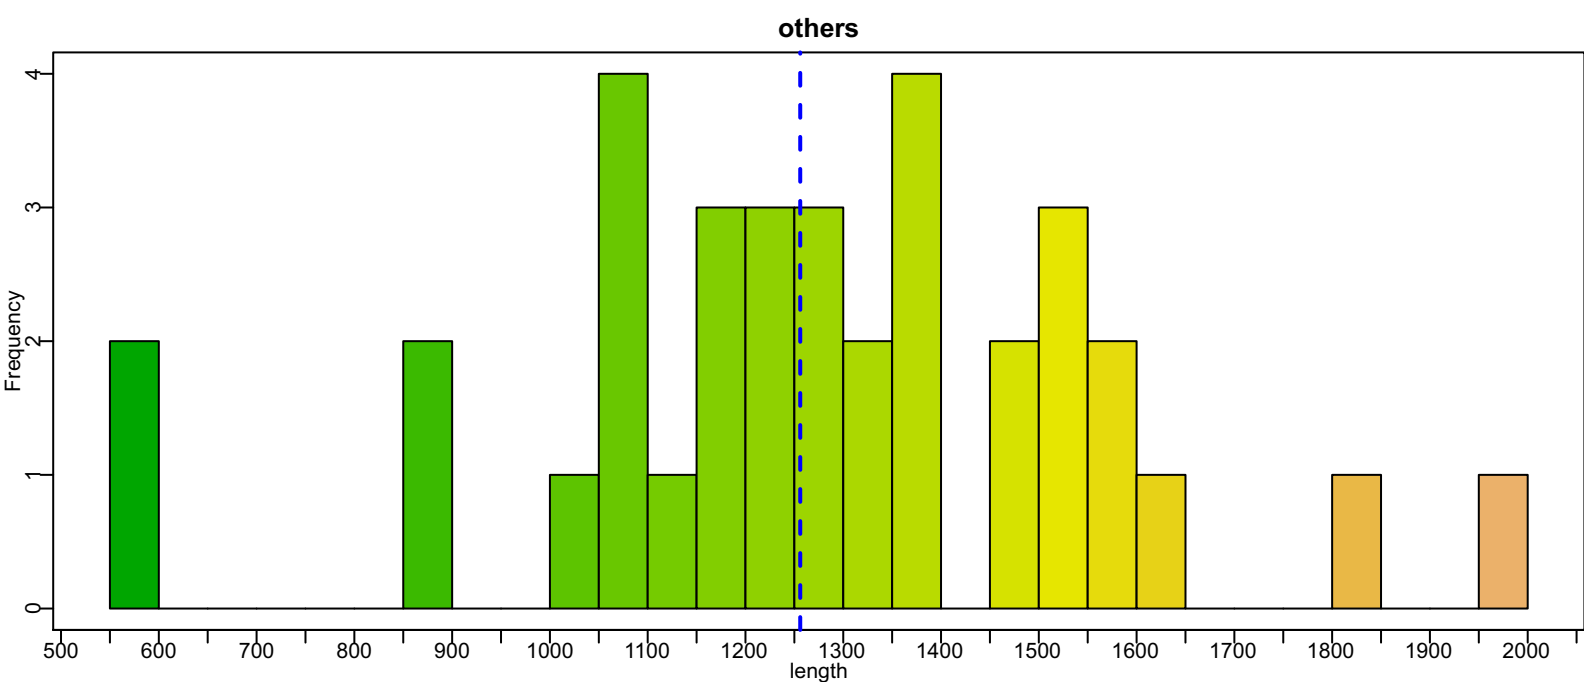

Supplement: supp [file elife-52696-supp-v1.zip]
